# Supplementary material
Source: PubMed Central journal article supplement (PMC2984237)
Supplement: supp_M110.001834_mcp.M110.001834-1.pdf [file supp_M110.001834_mcp.M110.001834-1.pdf]

**Supplemental Table 1. Identified HR O-glycopeptides of IgA1 (Ale) myeloma protein**

| Glycan structure                                                                                       | <i>m/z</i>             | Relative abundance (%) <sup>a</sup> | Mass error (ppm) |
|--------------------------------------------------------------------------------------------------------|------------------------|-------------------------------------|------------------|
| <b>C-terminal fragments</b>                                                                            |                        |                                     |                  |
| Peptide Sequence: <sup>222</sup> VPSTPPTPSPSTPPTPSPSCCHPR <sup>245</sup> (released by AK183 + trypsin) |                        |                                     |                  |
| GalNAc <sub>6</sub> Gal <sub>4</sub>                                                                   | 1431.9515              | 0.73                                | 2.073            |
| GalNAc <sub>6</sub> Gal <sub>3</sub>                                                                   | 1377.9324              | 1.28                                | 1.113            |
| GalNAc <sub>5</sub> Gal <sub>5</sub>                                                                   | 1418.2766              | 4.60                                | 1.928            |
| GalNAc <sub>5</sub> Gal <sub>4</sub>                                                                   | 1364.2567              | 24.24                               | 0.367            |
| GalNAc <sub>5</sub> Gal <sub>4</sub> NeuAc <sub>1</sub>                                                | 1461.2893              | 0.20                                | 1.429            |
| GalNAc <sub>5</sub> Gal <sub>3</sub>                                                                   | 1310.2415              | 12.19                               | 2.265            |
| GalNAc <sub>5</sub> Gal <sub>2</sub>                                                                   | 1256.2238              | 1.27                                | 2.867            |
| GalNAc <sub>4</sub> Gal <sub>4</sub>                                                                   | 1296.5641              | 34.02                               | 1.466            |
| GalNAc <sub>4</sub> Gal <sub>4</sub> NeuAc <sub>1</sub>                                                | 1393.5904              | 0.59                                | -2.488           |
| GalNAc <sub>4</sub> Gal <sub>3</sub>                                                                   | 1242.5404              | 17.96                               | -1.556           |
| GalNAc <sub>4</sub> Gal <sub>2</sub>                                                                   | 1188.5268              | 2.29                                | -0.055           |
| GalNAc <sub>3</sub> Gal <sub>3</sub>                                                                   | 1174.8495              | 0.63                                | -1.742           |
| Peptide Sequence: <sup>228</sup> TPSPSTPPTPSPSCCHPR <sup>245</sup> (released by TIGR4 + trypsin)       |                        |                                     |                  |
| GalNAc <sub>5</sub> Gal <sub>3</sub>                                                                   | 1117.4706              | 0.95                                | 1.671            |
| GalNAc <sub>5</sub> Gal <sub>2</sub>                                                                   | 1063.4525              | 1.10                                | 1.035            |
| GalNAc <sub>4</sub> Gal <sub>4</sub>                                                                   | 1103.7929              | 5.42                                | -0.452           |
| GalNAc <sub>4</sub> Gal <sub>3</sub>                                                                   | 1049.7754              | 25.07                               | -0.317           |
| GalNAc <sub>4</sub> Gal <sub>3</sub> NeuAc <sub>1</sub>                                                | 1146.8092              | 0.40                                | 1.570            |
| GalNAc <sub>4</sub> Gal <sub>2</sub>                                                                   | 995.7592               | 10.13                               | 1.139            |
| GalNAc <sub>4</sub> Gal <sub>1</sub>                                                                   | 941.7413               | 0.91                                | 0.956            |
| GalNAc <sub>3</sub> Gal <sub>3</sub>                                                                   | 982.0826               | 34.63                               | -0.135           |
| GalNAc <sub>3</sub> Gal <sub>3</sub> NeuAc <sub>1</sub>                                                | 1079.1162              | 0.55                                | 1.669            |
| GalNAc <sub>3</sub> Gal <sub>2</sub>                                                                   | 928.0656               | 18.28                               | 0.575            |
| GalNAc <sub>3</sub> Gal <sub>1</sub>                                                                   | 874.0488               | 2.22                                | 1.603            |
| GalNAc <sub>2</sub> Gal <sub>2</sub>                                                                   | 860.3724               | 0.35                                | 0.775            |
| Peptide Sequence: <sup>232</sup> STPPTPSPSCCHPR <sup>245</sup> (released by HK50 + trypsin)            |                        |                                     |                  |
| GalNAc <sub>3</sub> Gal <sub>1</sub>                                                                   | 746.6536               | 1.81                                | 1.711            |
| GalNAc <sub>2</sub> Gal <sub>2</sub>                                                                   | 732.9774               | 5.79                                | 1.015            |
| GalNAc <sub>2</sub> Gal <sub>1</sub>                                                                   | 678.9592               | 34.73                               | -0.181           |
| GalNAc <sub>2</sub>                                                                                    | 624.9426               | 0.74                                | 1.511            |
| GalNAc <sub>1</sub> Gal <sub>1</sub>                                                                   | 611.266                | 56.34                               | 0.016            |
| GalNAc <sub>1</sub>                                                                                    | 557.2492               | 0.58                                | 1.575            |
| <b>N-terminal fragments</b>                                                                            |                        |                                     |                  |
| Peptide Sequence: <sup>208</sup> HYTNPSQDVTVPCVPSTPP <sup>227</sup> (released by TIGR4 + trypsin)      |                        |                                     |                  |
| GalNAc <sub>1</sub> Gal <sub>1</sub>                                                                   | 1251.0752 <sup>b</sup> | 97.88                               | 1.731            |
| GalNAc <sub>1</sub>                                                                                    | 1170.0487 <sup>b</sup> | 0.22                                | 1.766            |
| Naked peptide                                                                                          | 1068.5088 <sup>b</sup> | 1.76                                | 1.746            |
| Peptide Sequence: <sup>208</sup> HYTNPSQDVTVPCVPSTPPTPSP <sup>231</sup> (released by HK50 + trypsin)   |                        |                                     |                  |
| GalNAc <sub>3</sub> Gal <sub>3</sub>                                                                   | 1205.2054              | 62.42                               | 0.493            |
| GalNAc <sub>3</sub> Gal <sub>3</sub> NeuAc <sub>1</sub>                                                | 1302.2375              | 1.84                                | 3.621            |
| GalNAc <sub>3</sub> Gal <sub>2</sub>                                                                   | 1151.187               | 28.14                               | 1.53             |
| GalNAc <sub>3</sub> Gal <sub>2</sub> NeuAc <sub>1</sub>                                                | 1248.2175              | 0.63                                | 1.908            |
| GalNAc <sub>3</sub> Gal <sub>1</sub>                                                                   | 1097.1686              | 2.07                                | 2.578            |
| GalNAc <sub>2</sub> Gal <sub>2</sub>                                                                   | 1083.4928              | 4.18                                | 2.475            |
| GalNAc <sub>2</sub> Gal <sub>1</sub>                                                                   | 1029.4734              | 0.72                                | 0.609            |

<sup>a</sup>Relative abundance of each glycopeptides is shown as mean value from two independent on-line LC FT ICR mass spectra of glycopeptides with or without alkylation.

<sup>b</sup>Glycopeptides are ionized as 2+ charged ions.
