# Supplementary material
Source: PubMed Central journal article supplement (PMC2984237)
Supplement: supp_M110.001834_mcp.M110.001834-2.pdf [file supp_M110.001834_mcp.M110.001834-2.pdf]

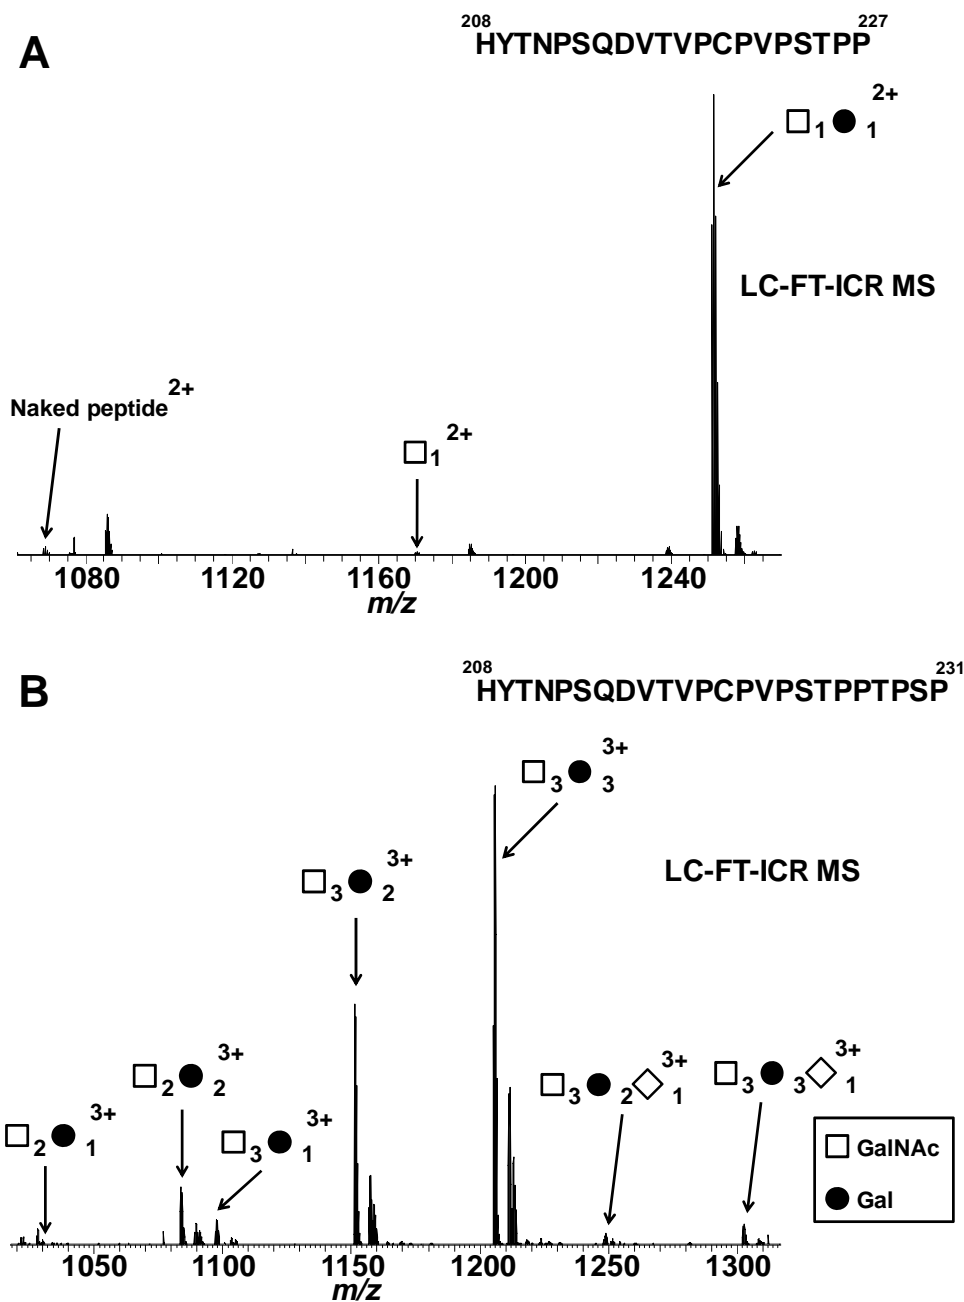

**Supplemental Figure 1. IgA-specific protease+trypsin-released N-terminal fragments of IgA1 HR *O*-glycopeptides.** IgA1 HR N-terminal glycopeptides released by IgA-specific protease TIGR4 and trypsin (a, H208-P227) and HK50 and trypsin (b, H208-P231). The H208-227 fragment was observed as three different ion species, including one with no modification (naked peptide), another with a single GalNAc, and the dominant species with a GalNAc-Gal disaccharide. These observed IgA1 HR *O*-glycopeptides included a few that were Gal-deficient or without glycosylation at T225. The H208-P231 fragment further corroborated this conclusion. All identified N-terminal fragments are listed in supplemental **Table 1**.

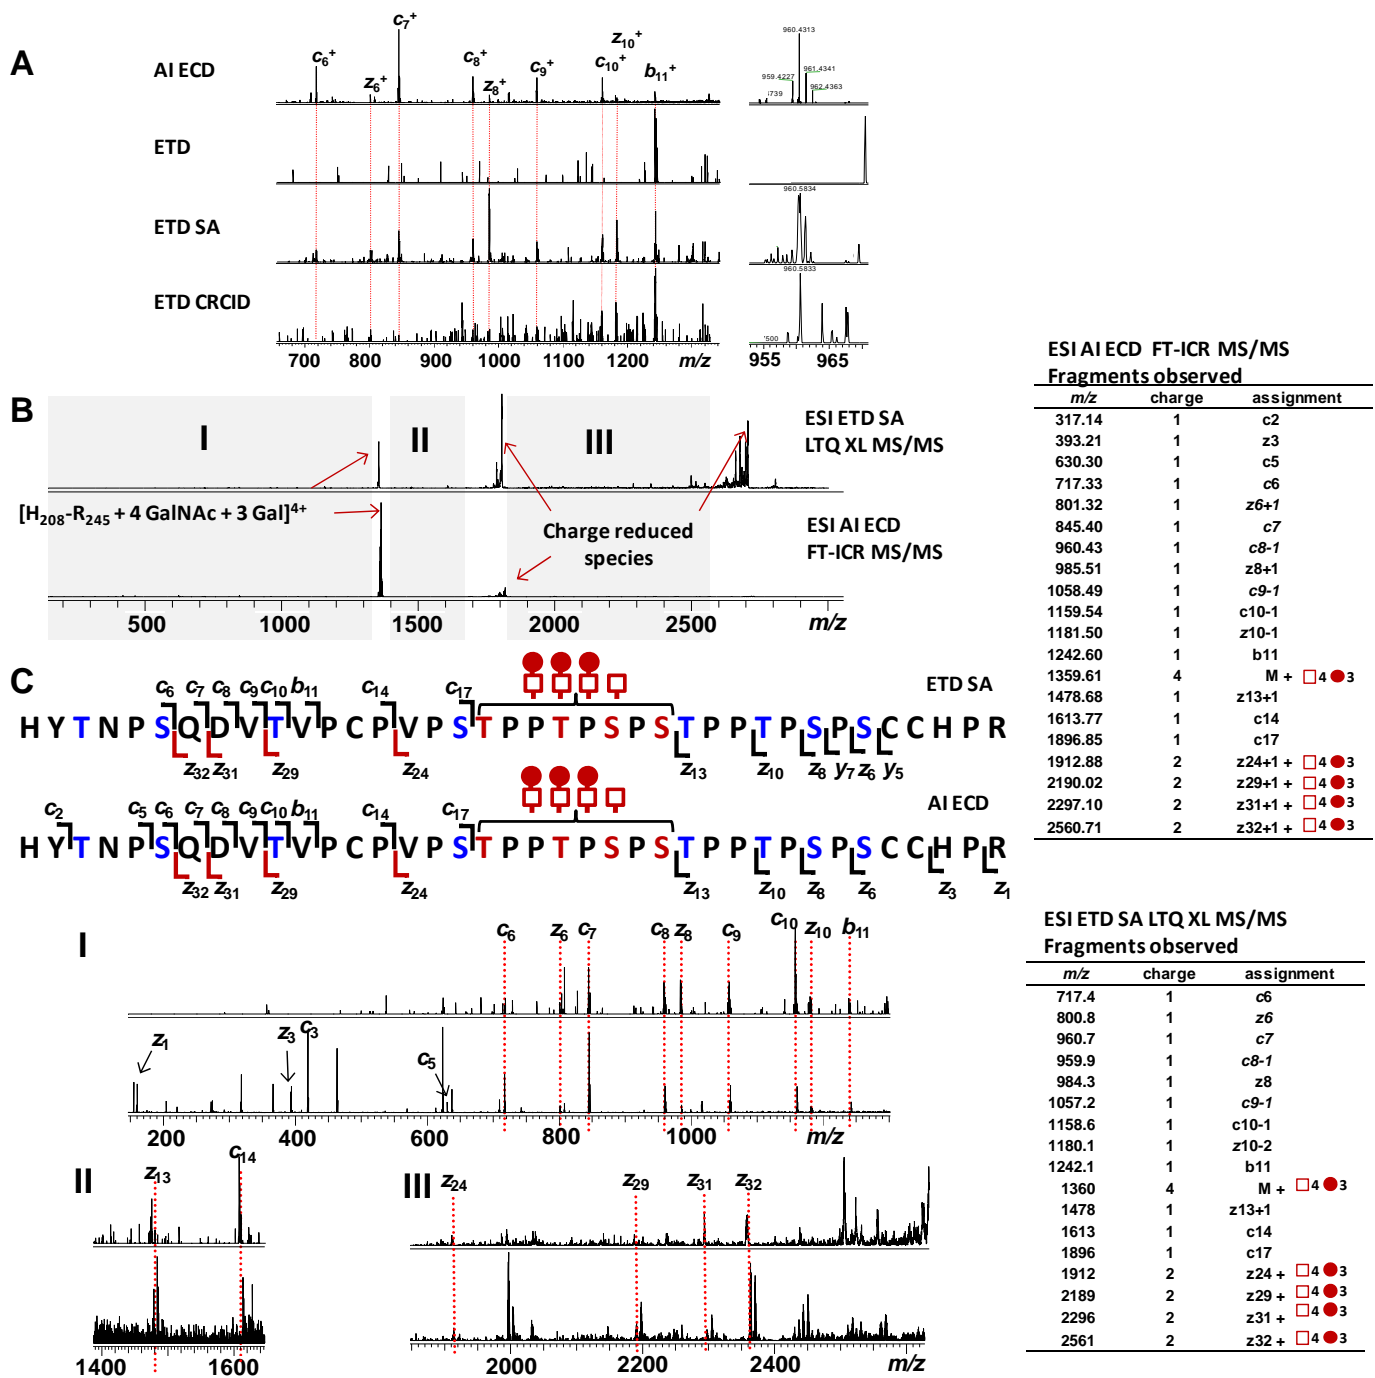

**Supplemental Figure 2. Comparison of AI-ECD and ETD SA fragmentation of IgA1 HR.** Results of preliminary experiments with direct infusion Nanomate ESI ETD SA LTQ XL MS/MS of the IgA1 HR  $[H_{208-R245} + 4 \text{ GalNAc} + 3 \text{ Gal}]^{4+}$  trypsin-generated fragment were compared with those using AI-ECD FT-ICR MS/MS of the same ion species. In a fashion similar to that with our previous ECD analysis of IgA1 HR *O*-glycopeptides, no *c* or *z* fragment was observed with ETD alone. When supplemental activation (SA) was included, several *c*, *z*, and *b* fragments were generated (a). The ETD spectra appear to have a greater conversion of precursor ion into charge-reduced species in the overall spectrum (b). Upon closer examination (c), the ETD SA fragments were no better for localizing individual sites of *O*-glycosylation in the clustered region than were the AI-ECD-generated fragments, suggesting that the mechanisms of dissociation were essentially identical.

### A LC-AI-ECD FT-ICR MS/MS

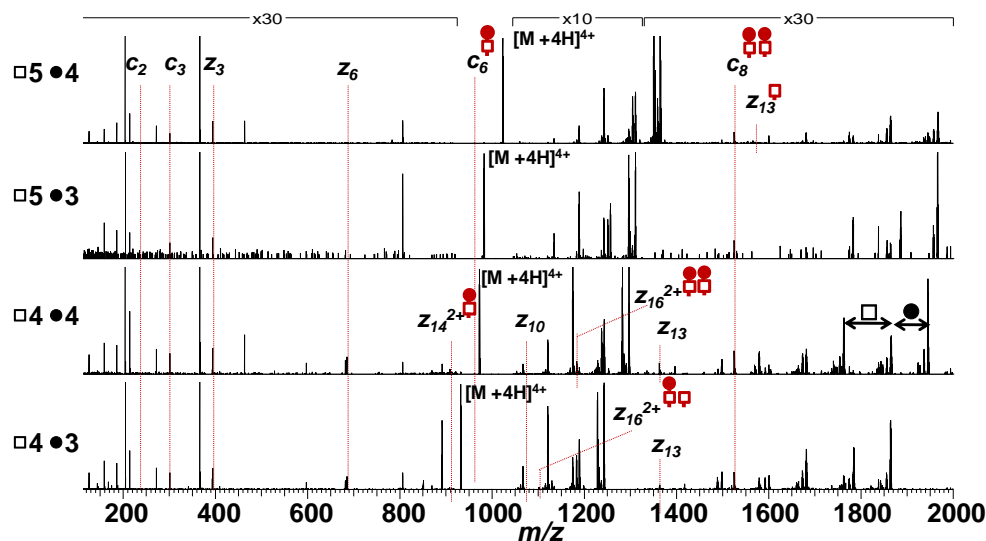

### LC-ESI AI ECD FT-ICR MS/MS Fragments observed

| m/z                                                                 | charge | assignment                                                                  |
|---------------------------------------------------------------------|--------|-----------------------------------------------------------------------------|
| Fragments common across all glycoforms                              |        |                                                                             |
| 214.155                                                             | 1      | c2                                                                          |
| 301.188                                                             | 1      | c3                                                                          |
| 394.221                                                             |        | z3+1                                                                        |
| 685.256                                                             | 1      | z6-1                                                                        |
| 871.358                                                             | 1      | z8+1                                                                        |
| 961.476                                                             | 1      | c6 + <span style="color:red">□</span> <span style="color:red">●</span> 1    |
| 1524.715                                                            | 1      | c8+ <span style="color:red">□</span> <span style="color:red">●</span> 2     |
| Fragments that distinguish 4 glycan chains                          |        |                                                                             |
| 908.392                                                             | 2      | z14 + <span style="color:red">□</span> <span style="color:red">●</span> 1   |
| 1068.450                                                            | 1      | z10                                                                         |
| 1363.591                                                            | 1      | z13-1                                                                       |
| <span style="color:red">□</span> <span style="color:red">●</span> 3 |        | specific M=972.176 4+                                                       |
| 1100.968                                                            | 2      | z16 + <span style="color:red">□</span> <span style="color:red">●</span> 1   |
| 1911.869                                                            | 1      | c10 + <span style="color:red">□</span> <span style="color:red">●</span> 2   |
| <span style="color:red">□</span> <span style="color:red">●</span> 4 |        | specific M=931.661 4+                                                       |
| 1182.999                                                            | 2      | z16-1 + <span style="color:red">□</span> <span style="color:red">●</span> 2 |
| Fragments that distinguish 5 glycan chains                          |        |                                                                             |
| <span style="color:red">□</span> <span style="color:red">●</span> 3 |        | M=982.433 4+                                                                |
| <span style="color:red">□</span> <span style="color:red">●</span> 4 |        | M=1022.946 4+                                                               |
| 1565.675                                                            | 1      | z13-1 <span style="color:red">□</span> 1                                    |

### B LC-ETD SA LTQ XL MS/MS

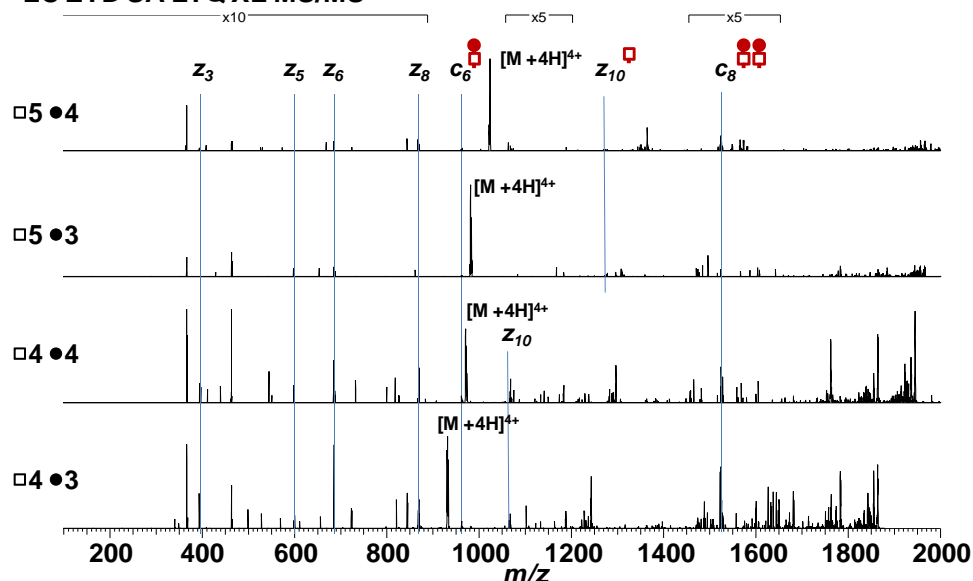

### LC-ESI ETD SA LTQ XL MS/MS Fragments observed

| m/z                                                                 | charge | assignment                                                               |
|---------------------------------------------------------------------|--------|--------------------------------------------------------------------------|
| Fragments common across all glycoforms                              |        |                                                                          |
| 394.1                                                               |        | z3+1                                                                     |
| 598                                                                 |        | z5                                                                       |
| 685.3                                                               | 1      | z6-1                                                                     |
| 867                                                                 | 1      | z8-3                                                                     |
| 961.2                                                               | 1      | c6 + <span style="color:red">□</span> <span style="color:red">●</span> 1 |
| 1524.8                                                              | 1      | c8+ <span style="color:red">□</span> <span style="color:red">●</span> 2  |
| Fragments that distinguish 4 glycan chains                          |        |                                                                          |
| <span style="color:red">□</span> <span style="color:red">●</span> 3 |        | M=972 4+                                                                 |
| <span style="color:red">□</span> <span style="color:red">●</span> 4 |        | M=931 4+                                                                 |
| 1068.1                                                              | 1      | z10                                                                      |
| 1363                                                                | 1      | z13-1                                                                    |
| Fragments that distinguish 5 glycan chains                          |        |                                                                          |
| <span style="color:red">□</span> <span style="color:red">●</span> 3 |        | M=982.4 4+                                                               |
| <span style="color:red">□</span> <span style="color:red">●</span> 4 |        | M=1023 4+                                                                |
| 1271                                                                | 1      | z10                                                                      |
| 1565.8                                                              | 1      | z13-1 <span style="color:red">□</span> 1                                 |

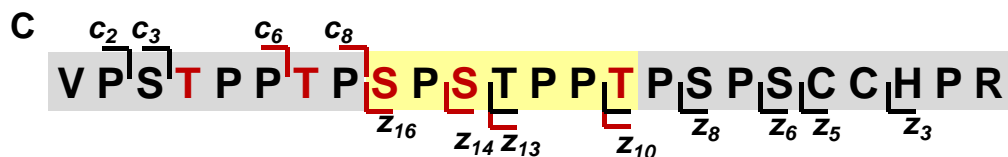

**Supplemental Figure 3. Data-dependent LC-ECD/ETD analysis of IgA1 HR *O*-glycopeptides.** **A.** LC-AI-ECD MS/MS (a) and LC-ETD SA MS/MS (b) of four most abundant IgA1 HR V222-R245 *O*-glycoforms isolated and fragmented within a single LC-MS analysis by each instrument. The ECD/ETD fragments that all four IgA1 HR *O*-glycoforms share in common were readily identified in all spectra with *c*<sub>6</sub> and *c*<sub>8</sub> ions. With these spectra, a GalNAc-Gal disaccharide can be assigned to T225 and T228. The z<sub>10</sub> fragment that distinguished the glycoforms with four *O*-glycan chains from those with five is also readily apparent. Fragments between S230 and P234 were less abundant, but still distinguishable, in the LC AI-ECD MS/MS analysis by accurate mass (c). Each individual fragmentation spectrum represents the sum of 6-8 scans. This number is considerably less than the 100 scans required for off-line preparations and allows analysis of clinically practical amounts of IgA1. All isolated precursor ions were quadruply charged.

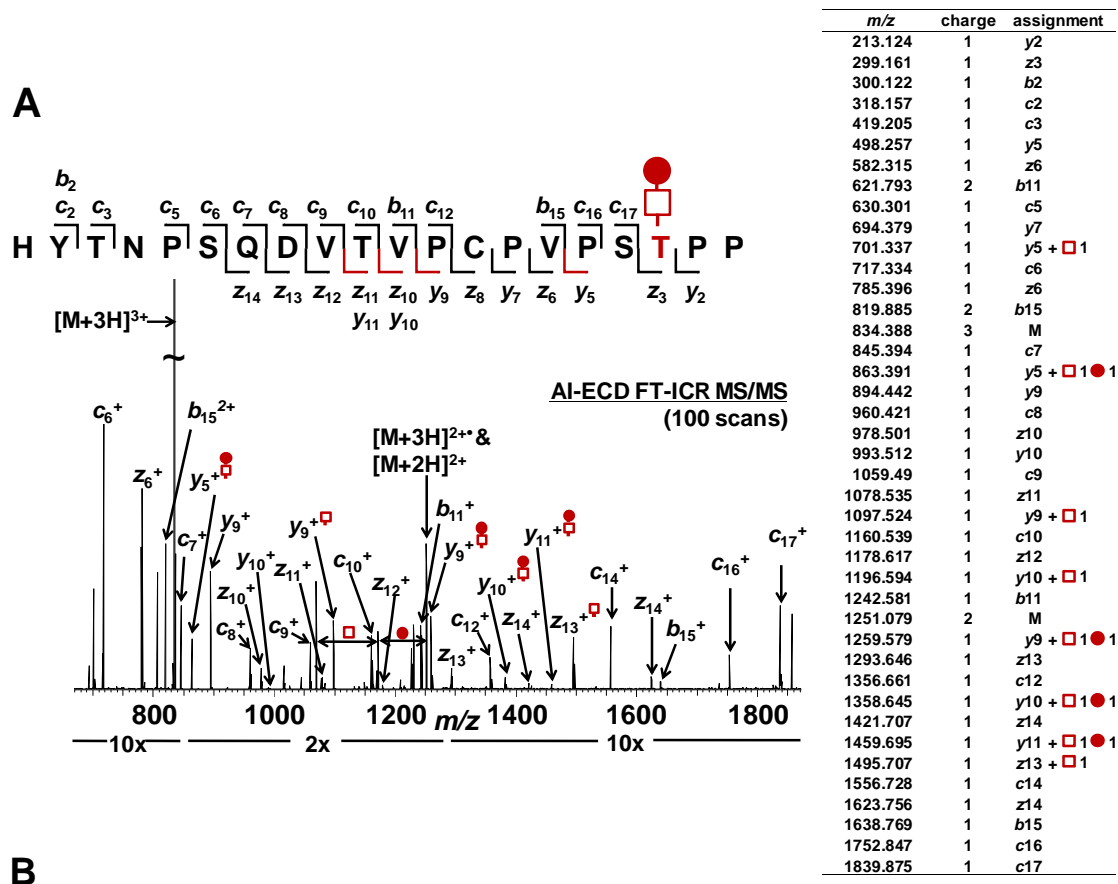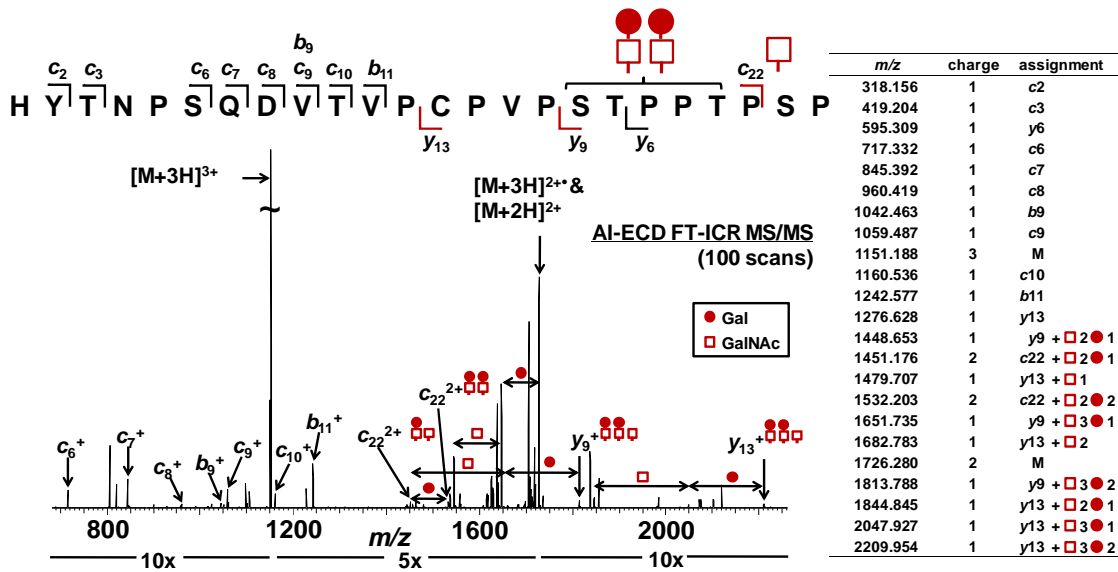

**Supplemental Figure 4. AI-ECD of N-terminal IgA1 HR fragments.** Direct infusion Nanomate ESI AI-ECD FT ICR MS/MS of IgA1 HR protease-trypsin N-terminal fragments H208-P227 and H208-231. A single GalNAc-Gal disaccharide was localized to T225 for the dominant H208-P227 fragment (see Supplementary Fig. 1A). Still, there are several z and y fragments from the C-terminal end of this peptide that corresponded to the loss of the disaccharide (below the sequence in black), rendering the assignment ambiguous. The same feature was found for the H208-P231 + 3 GalNAc + 2 Gal fragment with a y<sub>6</sub> ion lacking a carbohydrate residue. The ambiguity of these AI-ECD spectra contrasts to the clarity for the spectra of the C-terminal fragments that include a C-terminal arginine with loss of carbohydrate residues from the parent ion species but no ambiguity in the c, z, and y fragments in the spectra for assignment of the sites of O-glycosylation.
