# Supplementary material
Source: PubMed Central journal article supplement (PMC2984237)
Supplement: supp_M110.001834_mcp.M110.001834-3.pdf [file supp_M110.001834_mcp.M110.001834-3.pdf]

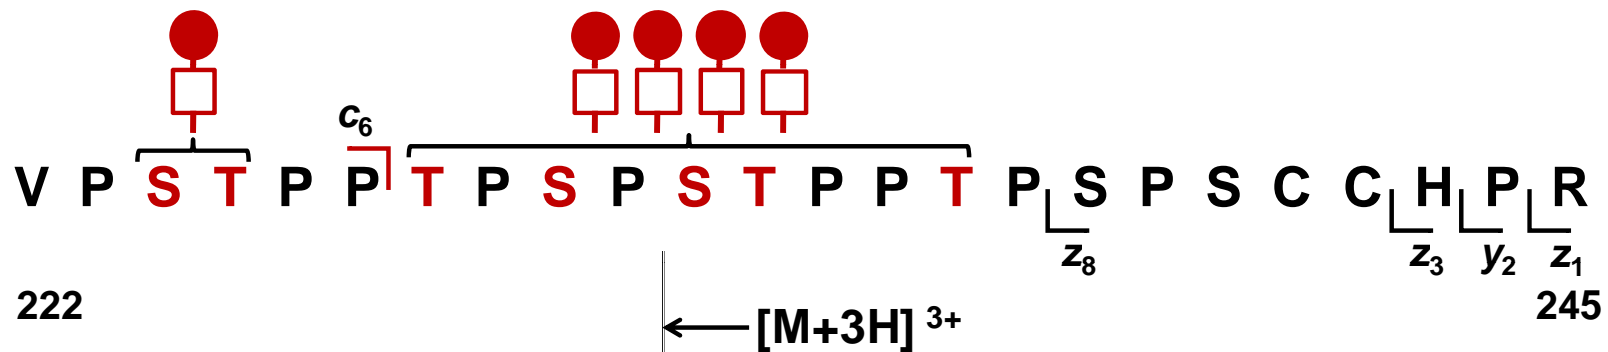

**AI-ECD FT-ICR MS/MS**  
(100 scans)

| <i>m/z</i> | charge | assignment |
|------------|--------|------------|
| 160.108    | 1      | z1         |
| 271.165    | 1      | y2         |
| 394.221    | 1      | z3         |
| 871.359    | 1      | z8         |
| 961.477    | 1      | c6 + □1 ●1 |
| 1418.287   | 3      | M          |
| 2126.927   | 2      | M          |

[M+3H]<sup>2+•</sup> &  
[M+2H]<sup>2+</sup> →

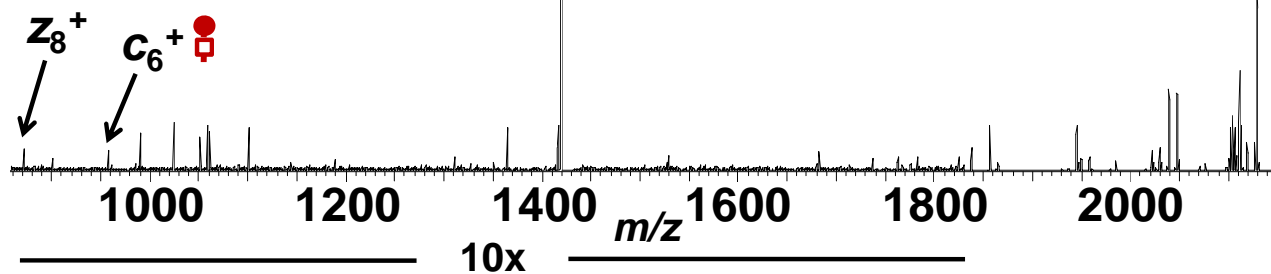

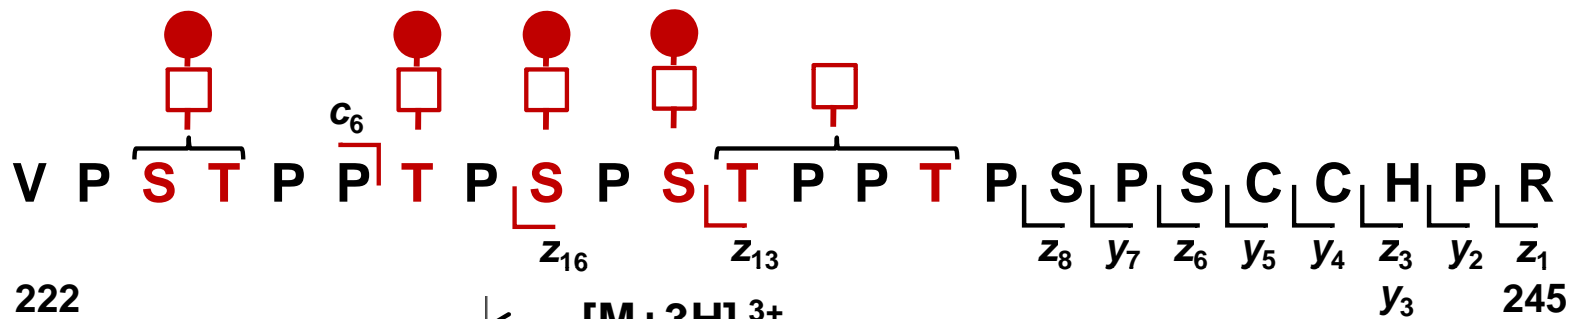

222

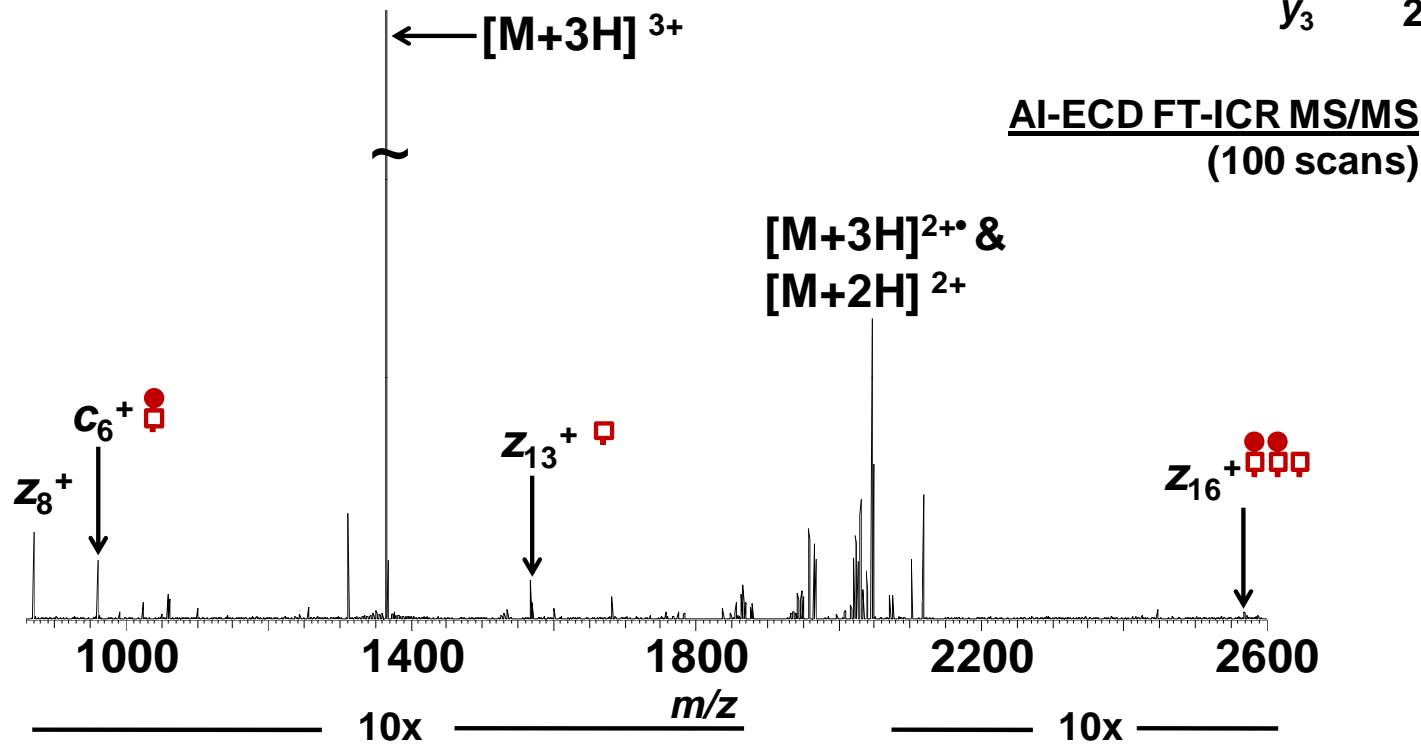

AI-ECD FT-ICR MS/MS  
(100 scans)

| <i>m/z</i> | charge | assignment    |
|------------|--------|---------------|
| 160.108    | 1      | z1            |
| 272.172    | 1      | y2            |
| 393.213    | 1      | z3            |
| 409.232    | 1      | y3            |
| 512.241    | 1      | y4            |
| 615.251    | 1      | y5            |
| 687.274    | 1      | z6            |
| 798.330    | 1      | y7            |
| 871.359    | 1      | z8            |
| 961.478    | 1      | c6 + □ 1 ● 1  |
| 1364.267   | 3      | M             |
| 1567.701   | 1      | z13 + □ 1     |
| 2045.905   | 2      | M             |
| 2569.091   | 1      | z16 + □ 3 ● 2 |

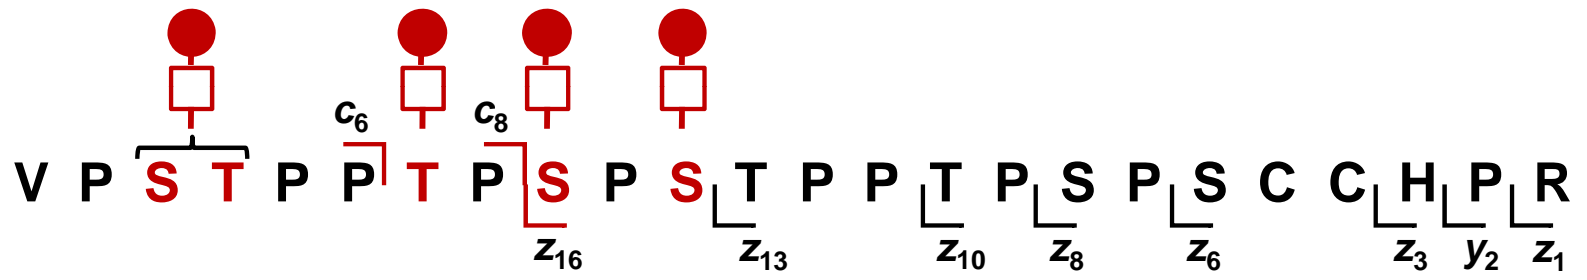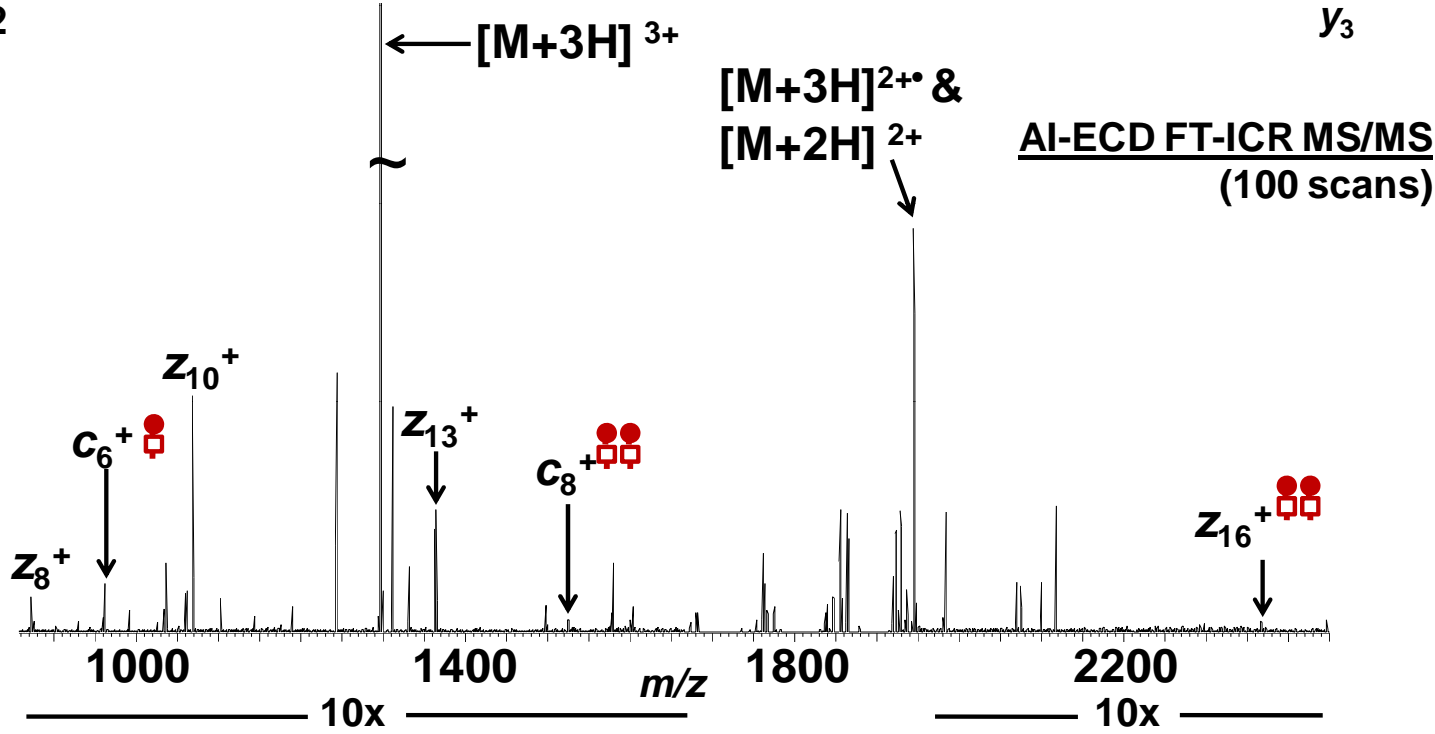

| <i>m/z</i> | charge | assignment                    |
|------------|--------|-------------------------------|
| 160.108    | 1      | z1                            |
| 272.172    | 1      | y2                            |
| 393.213    | 1      | z3                            |
| 409.232    | 1      | y3                            |
| 687.272    | 1      | z6                            |
| 871.358    | 1      | z8                            |
| 961.478    | 1      | c6 + $\square$ 1 $\bullet$ 1  |
| 1069.459   | 1      | z10                           |
| 1296.570   | 3      | M                             |
| 1364.615   | 1      | z13                           |
| 1524.720   | 1      | c8 + $\square$ 2 $\bullet$ 2  |
| 1944.355   | 2      | M                             |
| 2366.043   | 1      | z16 + $\square$ 2 $\bullet$ 2 |

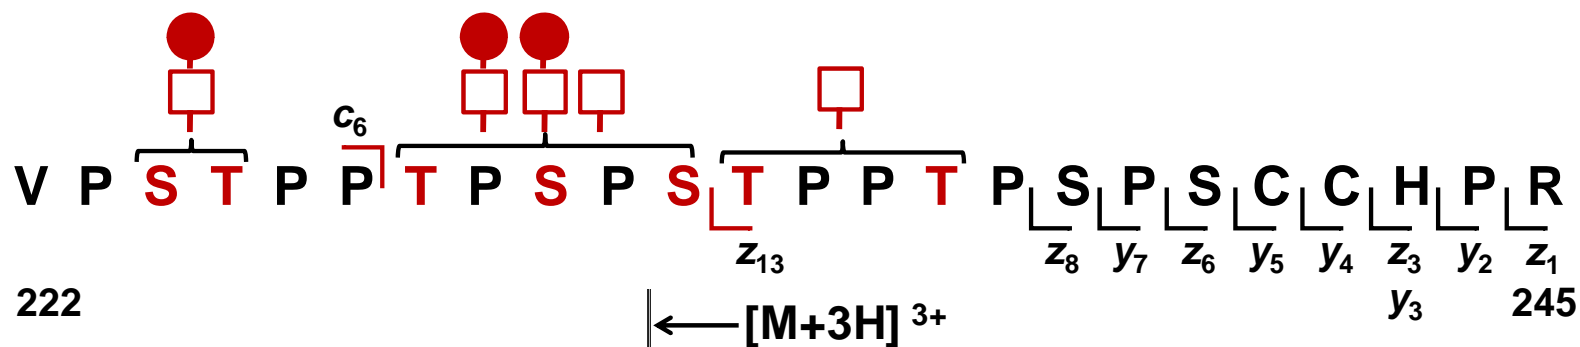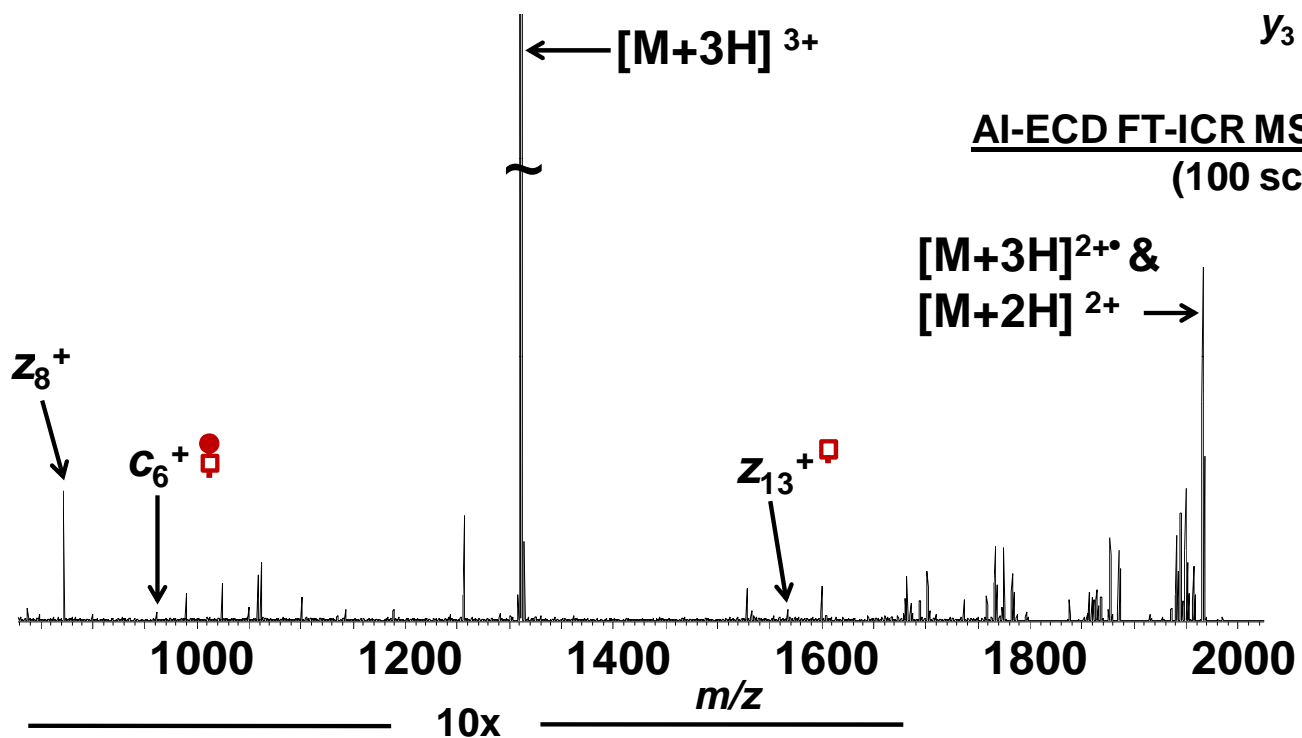

| m/z      | charge | assignment |
|----------|--------|------------|
| 160.108  | 1      | z1         |
| 272.172  | 1      | y2         |
| 393.214  | 1      | z3         |
| 409.232  | 1      | y3         |
| 512.241  | 1      | y4         |
| 615.251  | 1      | y5         |
| 687.274  | 1      | z6         |
| 798.331  | 1      | y7         |
| 871.359  | 1      | z8         |
| 961.476  | 1      | c6 + □1 ●1 |
| 1310.248 | 3      | M          |
| 1567.690 | 1      | z13 + □1   |
| 1964.871 | 2      | M          |

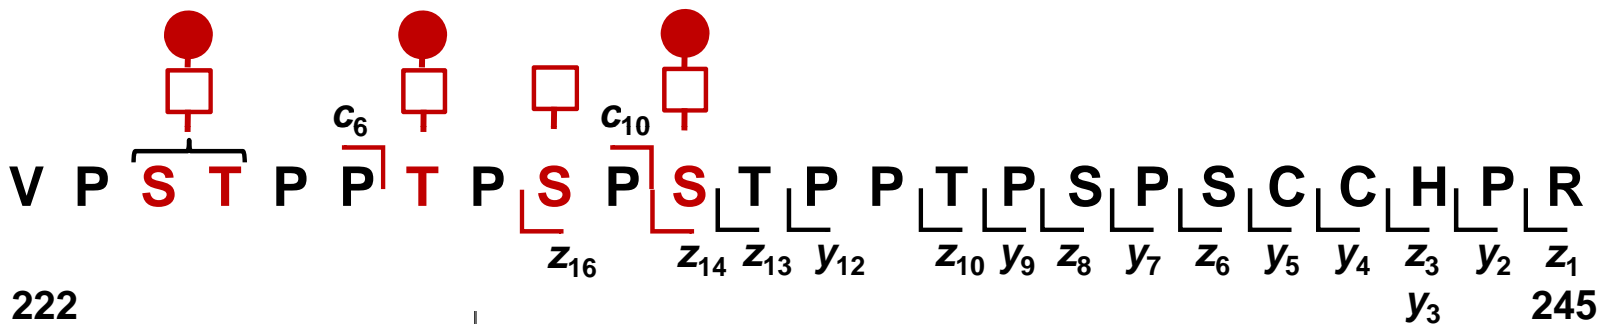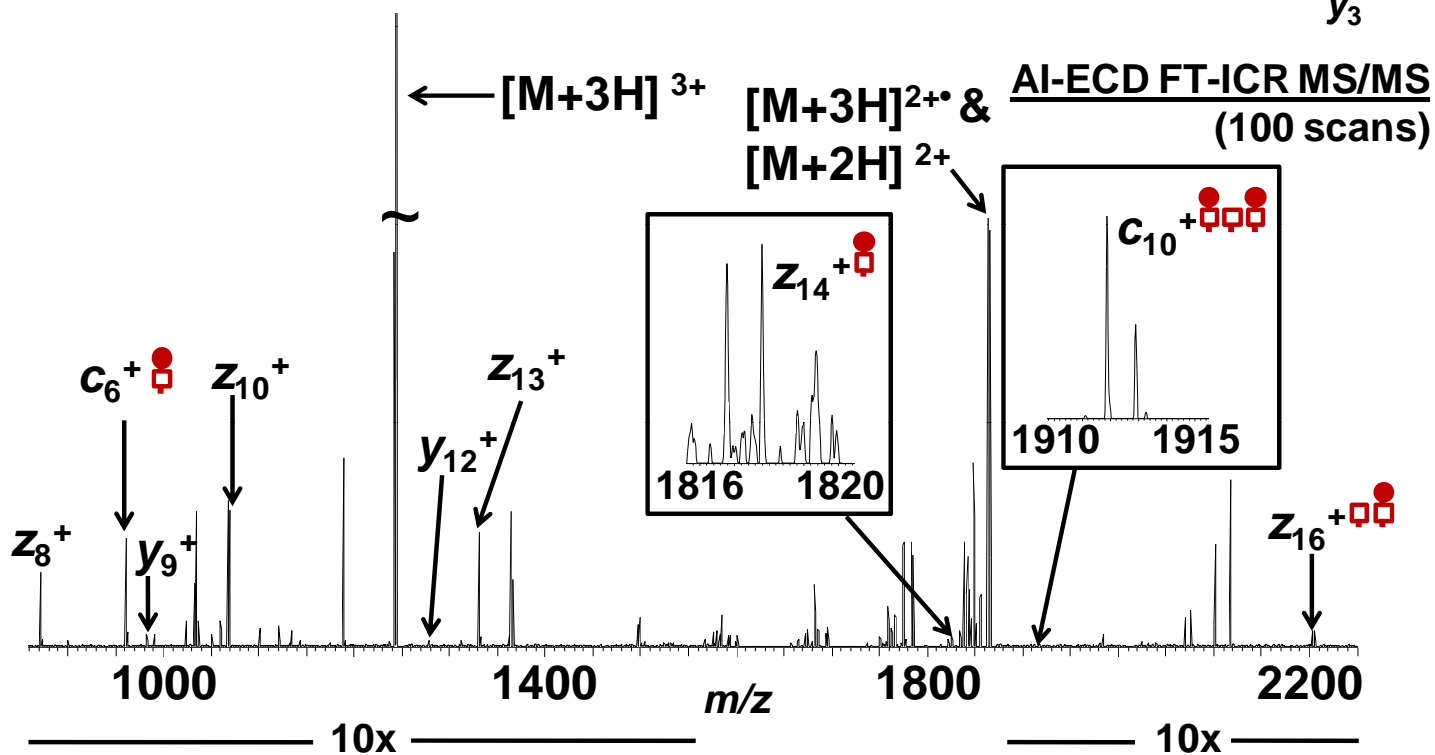

| <i>m/z</i> | charge | assignment  |
|------------|--------|-------------|
| 160.108    | 1      | z1          |
| 272.172    | 1      | y2          |
| 393.213    | 1      | z3          |
| 409.232    | 1      | y3          |
| 512.241    | 1      | y4          |
| 615.252    | 1      | y5          |
| 687.273    | 1      | z6          |
| 799.334    | 1      | y7          |
| 871.359    | 1      | z8          |
| 961.478    | 1      | c6 + □1 ●1  |
| 982.416    | 1      | y9          |
| 1069.463   | 1      | z10         |
| 1242.553   | 3      | M           |
| 1278.581   | 1      | y12         |
| 1364.620   | 1      | z13         |
| 1816.781   | 1      | z14 + □1 ●1 |
| 1863.332   | 2      | M           |
| 1911.878   | 1      | c10 + □3 ●2 |
| 2203.942   | 1      | z16 + □2 ●1 |

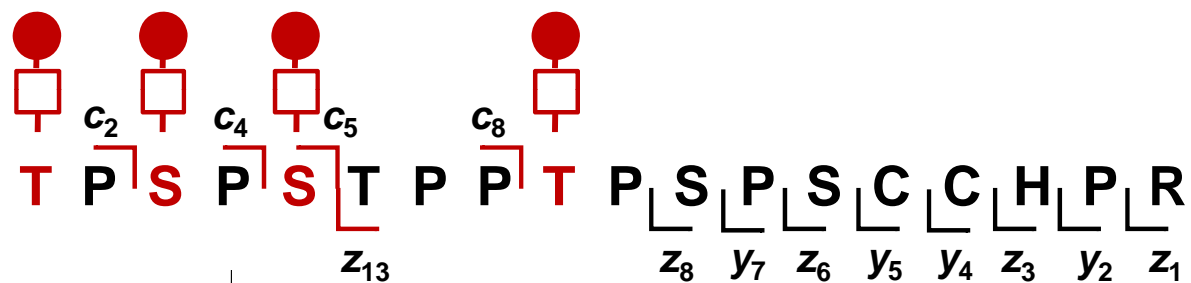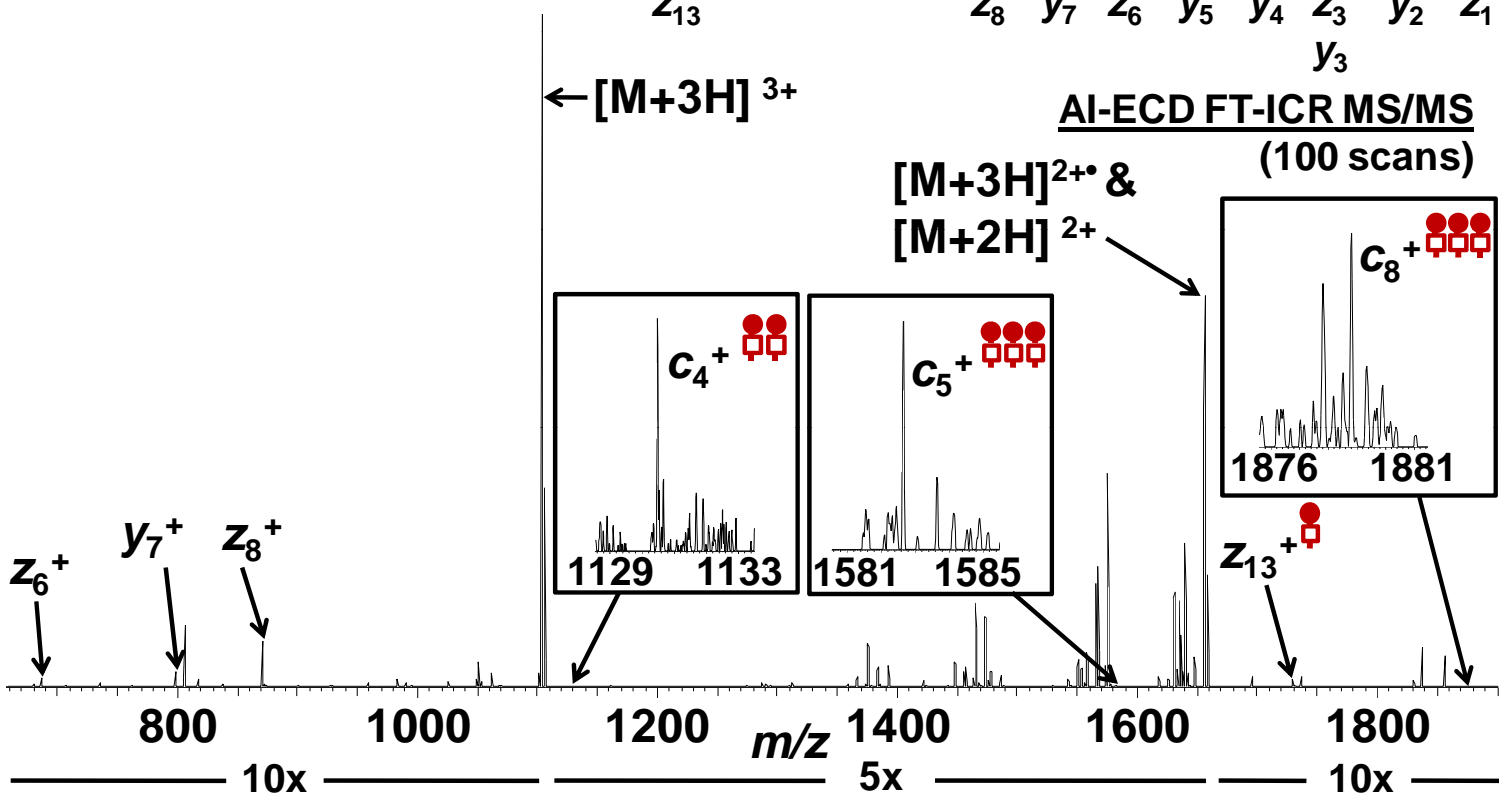

| $m/z$    | charge | assignment                     |
|----------|--------|--------------------------------|
| 160.108  | 1      | $z_1$                          |
| 272.172  | 1      | $y_2$                          |
| 393.212  | 1      | $z_3$                          |
| 409.231  | 1      | $y_3$                          |
| 512.241  | 1      | $y_4$                          |
| 581.269  | 1      | $c_2 + \square 1 \bullet 1$    |
| 615.250  | 1      | $y_5$                          |
| 687.273  | 1      | $z_6$                          |
| 798.328  | 1      | $y_7$                          |
| 871.358  | 1      | $z_8$                          |
| 1103.799 | 3      | M                              |
| 1130.484 | 1      | $c_4 + \square 2 \bullet 2$    |
| 1582.660 | 1      | $c_5 + \square 3 \bullet 3$    |
| 1655.195 | 2      | M                              |
| 1729.750 | 1      | $z_{13} + \square 1 \bullet 1$ |
| 1877.814 | 1      | $c_8 + \square 3 \bullet 3$    |

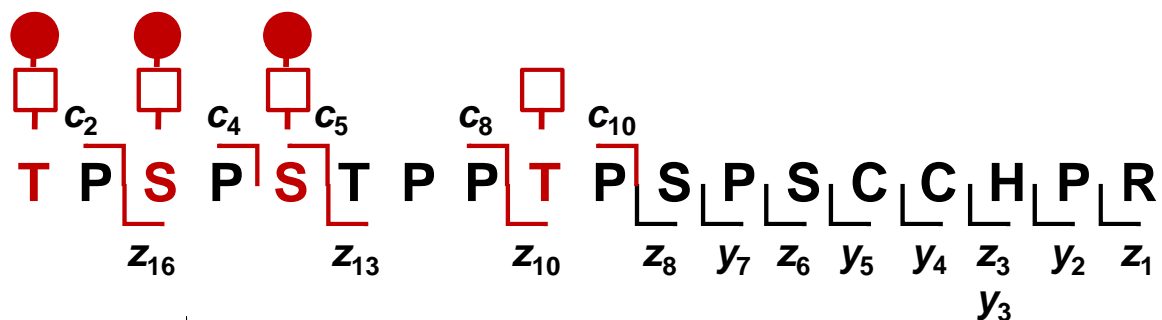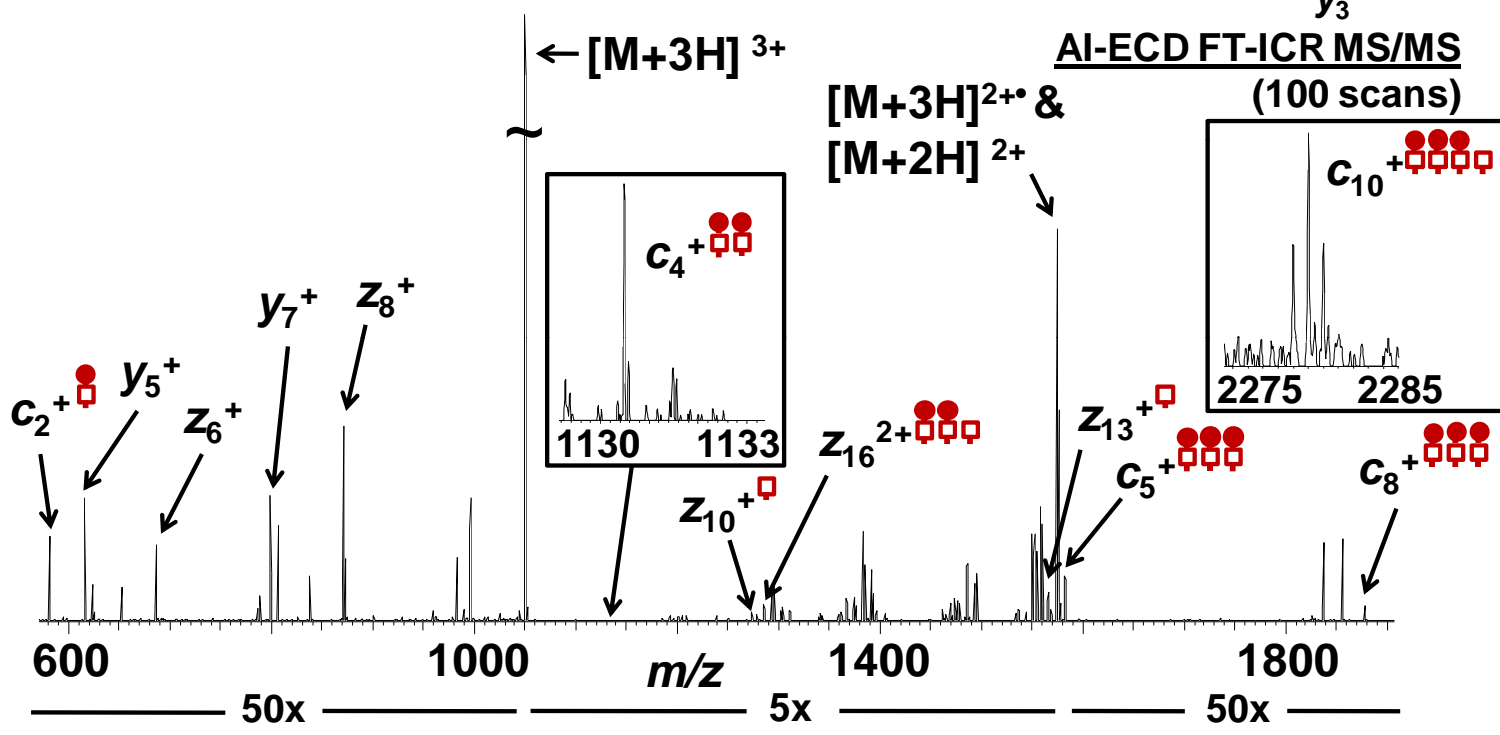

| <i>m/z</i> | charge | assignment  |
|------------|--------|-------------|
| 160.108    | 1      | z1          |
| 271.164    | 1      | y2          |
| 393.213    | 1      | z3          |
| 409.231    | 1      | y3          |
| 512.241    | 1      | y4          |
| 581.269    | 1      | c2 +  1  1  |
| 615.251    | 1      | y5          |
| 687.273    | 1      | z6          |
| 798.329    | 1      | y7          |
| 871.359    | 1      | z8          |
| 1049.781   | 3      | M           |
| 1130.490   | 1      | c4 +  2  2  |
| 1272.541   | 1      | z10 +  1    |
| 1285.044   | 2      | z16 +  3  2 |
| 1567.702   | 1      | z13 +  1    |
| 1574.171   | 2      | M           |
| 1582.659   | 1      | c5 +  3  3  |
| 1877.815   | 1      | c8 +  3  3  |
| 2279.004   | 1      | c10 +  4  3 |

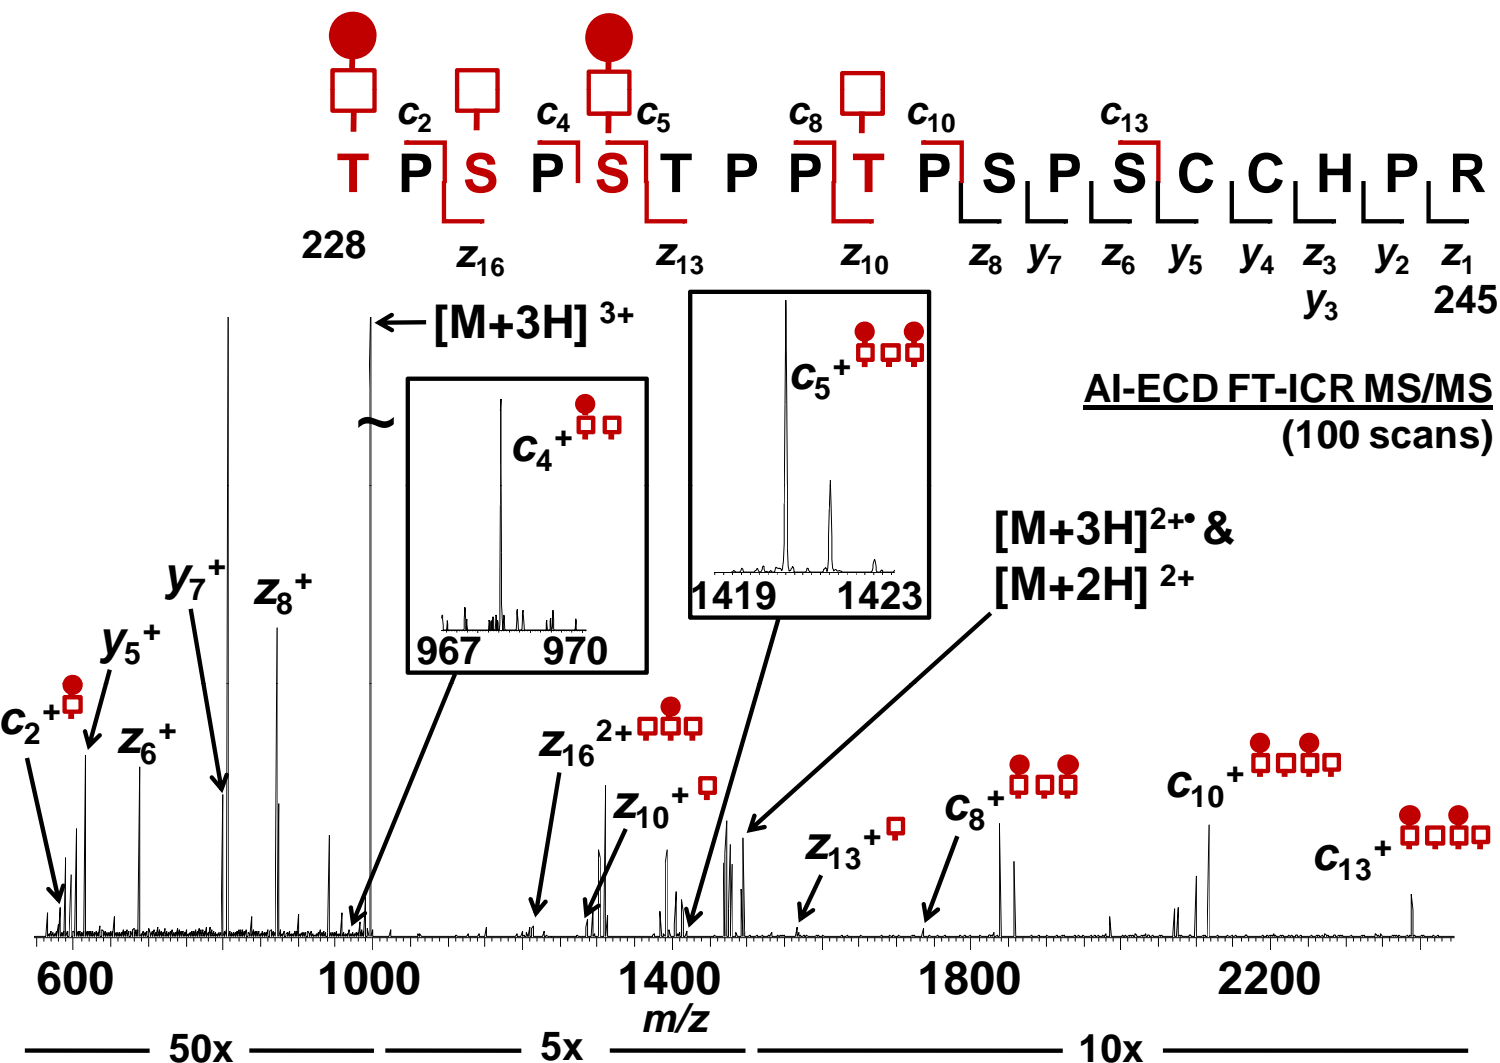

| m/z      | charge | assignment  |
|----------|--------|-------------|
| 160.108  | 1      | z1          |
| 272.172  | 1      | y2          |
| 393.213  | 1      | z3          |
| 409.232  | 1      | y3          |
| 512.242  | 1      | y4          |
| 581.269  | 1      | c2 + □1 ●1  |
| 615.251  | 1      | y5          |
| 687.272  | 1      | z6          |
| 798.33   | 1      | y7          |
| 871.359  | 1      | z8          |
| 968.436  | 1      | c4 + □2 ●1  |
| 995.762  | 3      | M           |
| 1204.018 | 2      | z16 + □3 ●1 |
| 1272.545 | 1      | z10 + □1    |
| 1420.605 | 1      | c5 + □3 ●2  |
| 1493.142 | 2      | M           |
| 1567.701 | 1      | z13 + □1    |
| 1715.751 | 1      | c8 + □3 ●2  |
| 2116.950 | 1      | c10 + □4 ●2 |
| 2388.067 | 1      | c13 + □4 ●2 |



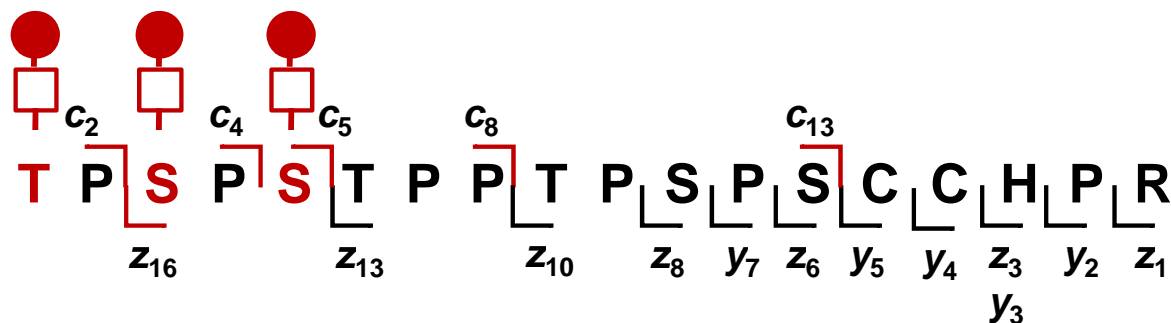

| <i>m/z</i> | charge | assignment  |
|------------|--------|-------------|
| 160.108    | 1      | z1          |
| 271.164    | 1      | y2          |
| 393.213    | 1      | z3          |
| 409.231    | 1      | y3          |
| 512.241    | 1      | y4          |
| 581.269    | 1      | c2 +  1  1  |
| 615.251    | 1      | y5          |
| 687.272    | 1      | z6          |
| 798.329    | 1      | y7          |
| 871.359    | 1      | z8          |
| 982.088    | 3      | M           |
| 1069.462   | 1      | z10         |
| 1130.494   | 1      | c4 +  2  2  |
| 1183.504   | 2      | z16 +  2  2 |
| 1364.619   | 1      | z13         |
| 1472.631   | 2      | M           |
| 1582.663   | 1      | c5 +  3  3  |
| 1877.803   | 1      | c8 +  3  3  |
| 2347.038   | 1      | c13 +  3  3 |

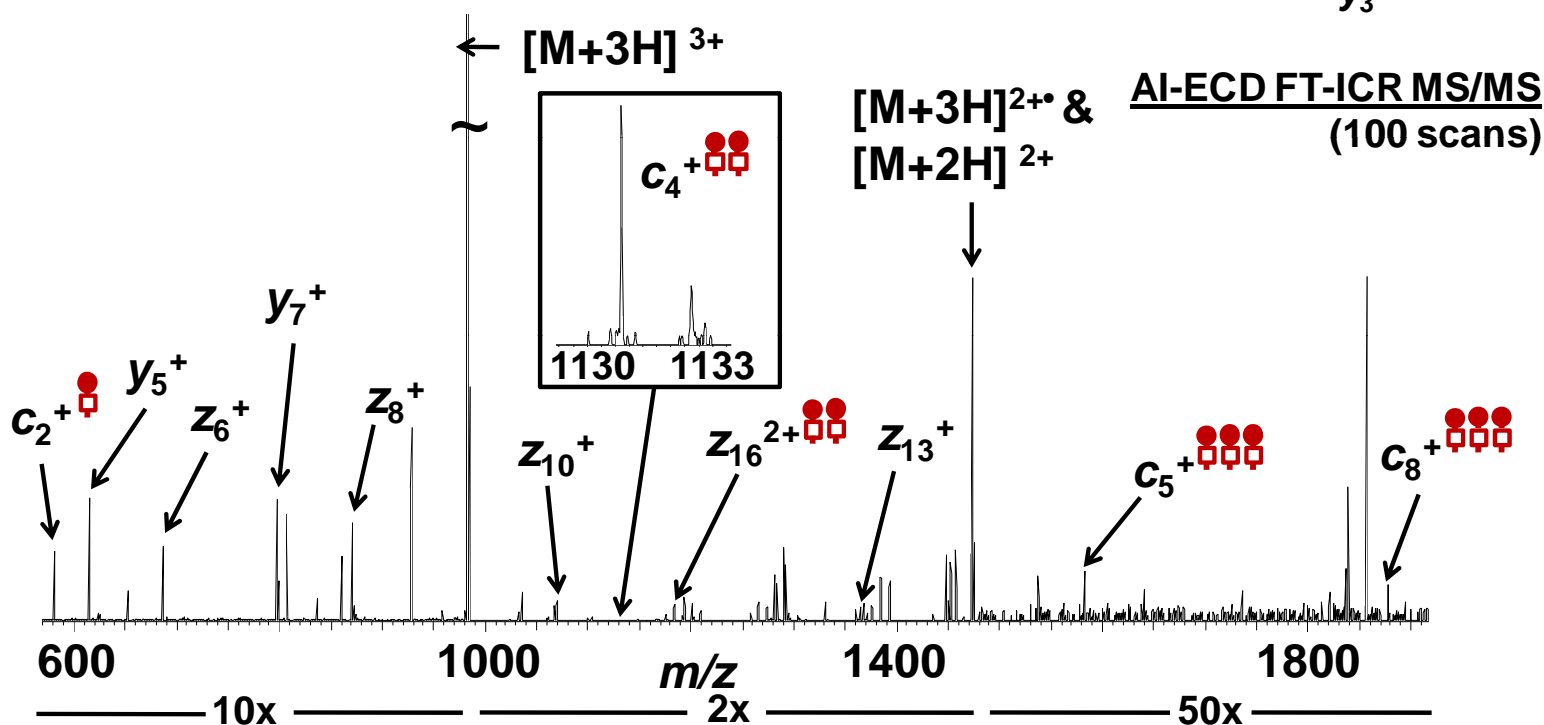

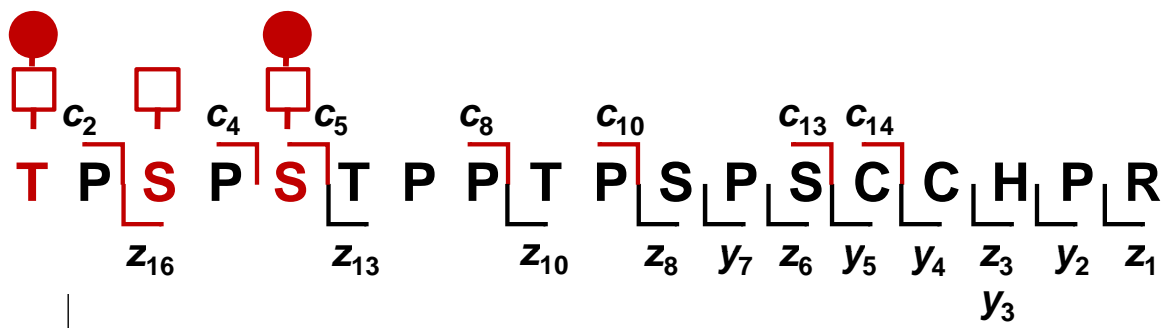

| <i>m/z</i> | charge | assignment  |
|------------|--------|-------------|
| 160.108    | 1      | z1          |
| 271.165    | 1      | y2          |
| 393.213    | 1      | z3          |
| 409.231    | 1      | y3          |
| 512.241    | 1      | y4          |
| 581.268    | 1      | c2 + □1 ●1  |
| 615.250    | 1      | y5          |
| 687.272    | 1      | z6          |
| 798.328    | 1      | y7          |
| 871.361    | 1      | z8          |
| 928.069    | 3      | M           |
| 968.439    | 1      | c4 + □2 ●1  |
| 1069.449   | 1      | z10         |
| 1102.476   | 2      | z16 + □2 ●1 |
| 1364.615   | 1      | z13         |
| 1391.602   | 2      | M           |
| 1420.600   | 1      | c5 + □3 ●2  |
| 1715.779   | 1      | c8 + □3 ●2  |
| 1913.865   | 1      | c10 + □3 ●2 |
| 2184.985   | 1      | c13 + □3 ●2 |
| 2345.018   | 1      | c14 + □3 ●2 |

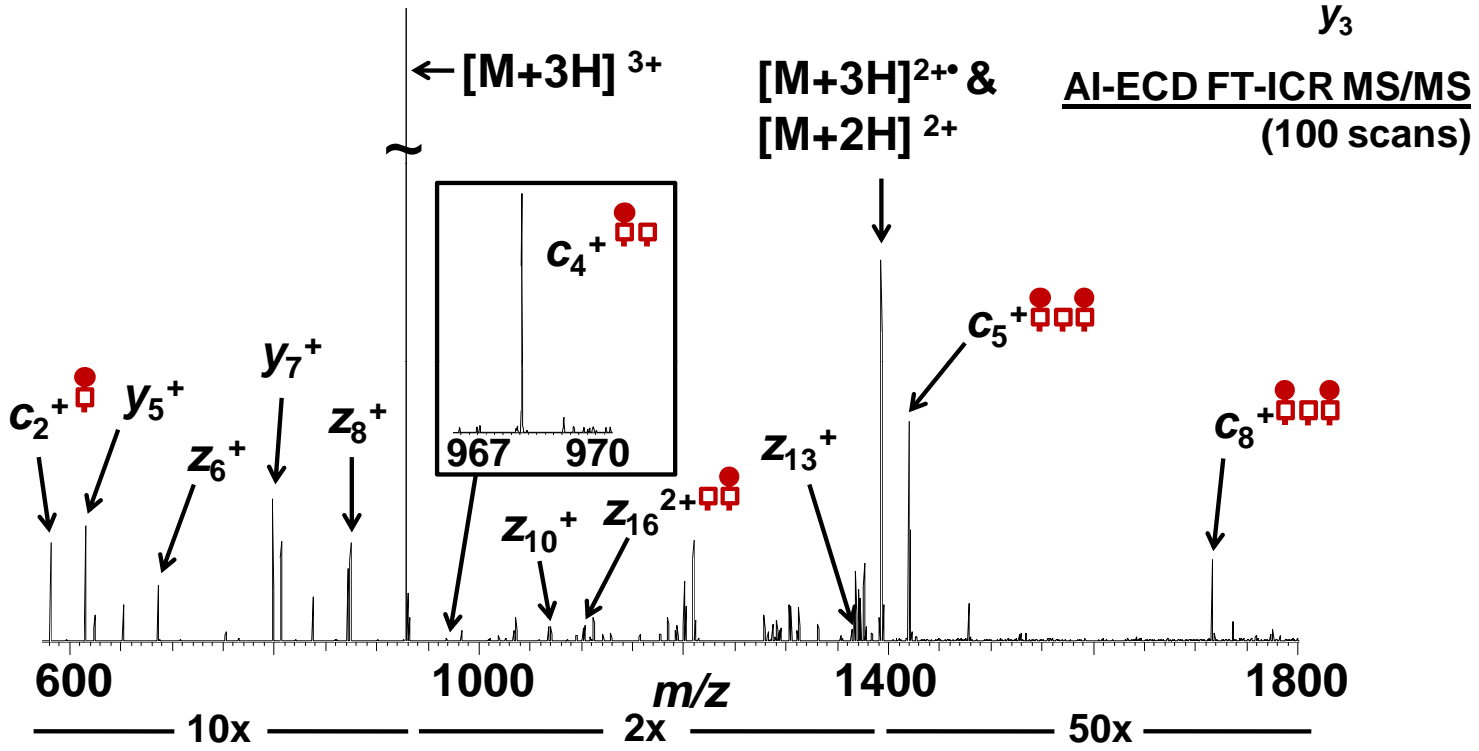

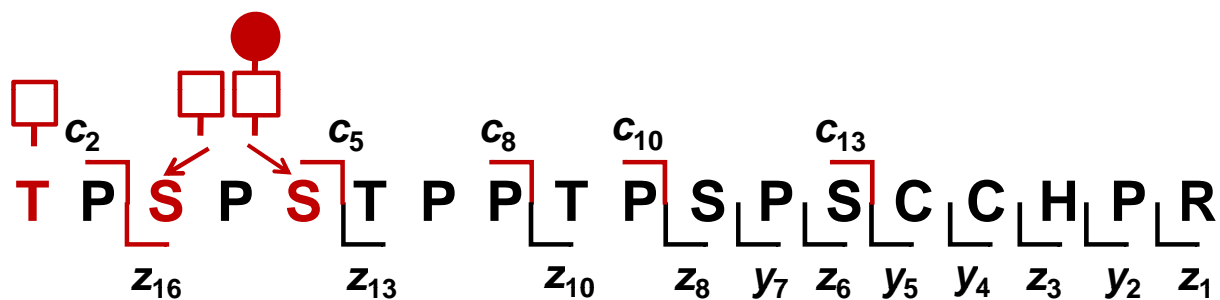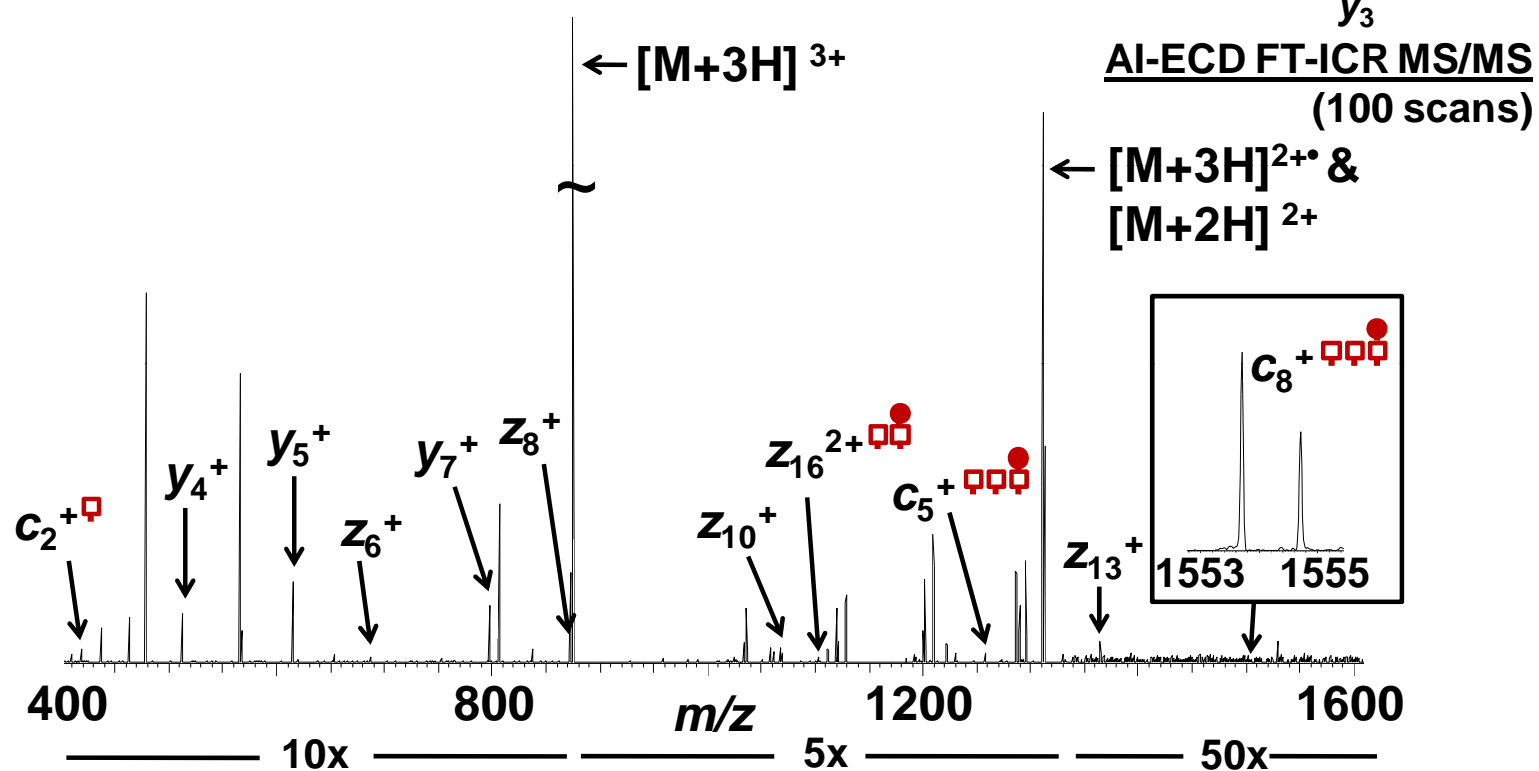

| <i>m/z</i> | charge | assignment |
|------------|--------|------------|
| 160.108    | 1      | z1         |
| 272.172    | 1      | y2         |
| 393.213    | 1      | z3         |
| 409.232    | 1      | y3         |
| 419.215    | 1      | c2 + 1     |
| 512.242    | 1      | y4         |
| 615.251    | 1      | y5         |
| 687.273    | 1      | z6         |
| 798.330    | 1      | y7         |
| 874.052    | 3      | M          |
| 1069.463   | 1      | z10        |
| 1102.477   | 2      | z16 + 2 1  |
| 1258.550   | 1      | c5 + 3 1   |
| 1364.617   | 1      | z13        |
| 1553.711   | 1      | c8 + 3 1   |
| 1751.812   | 1      | c10 + 3 1  |
| 2022.932   | 1      | c13 + 3 1  |

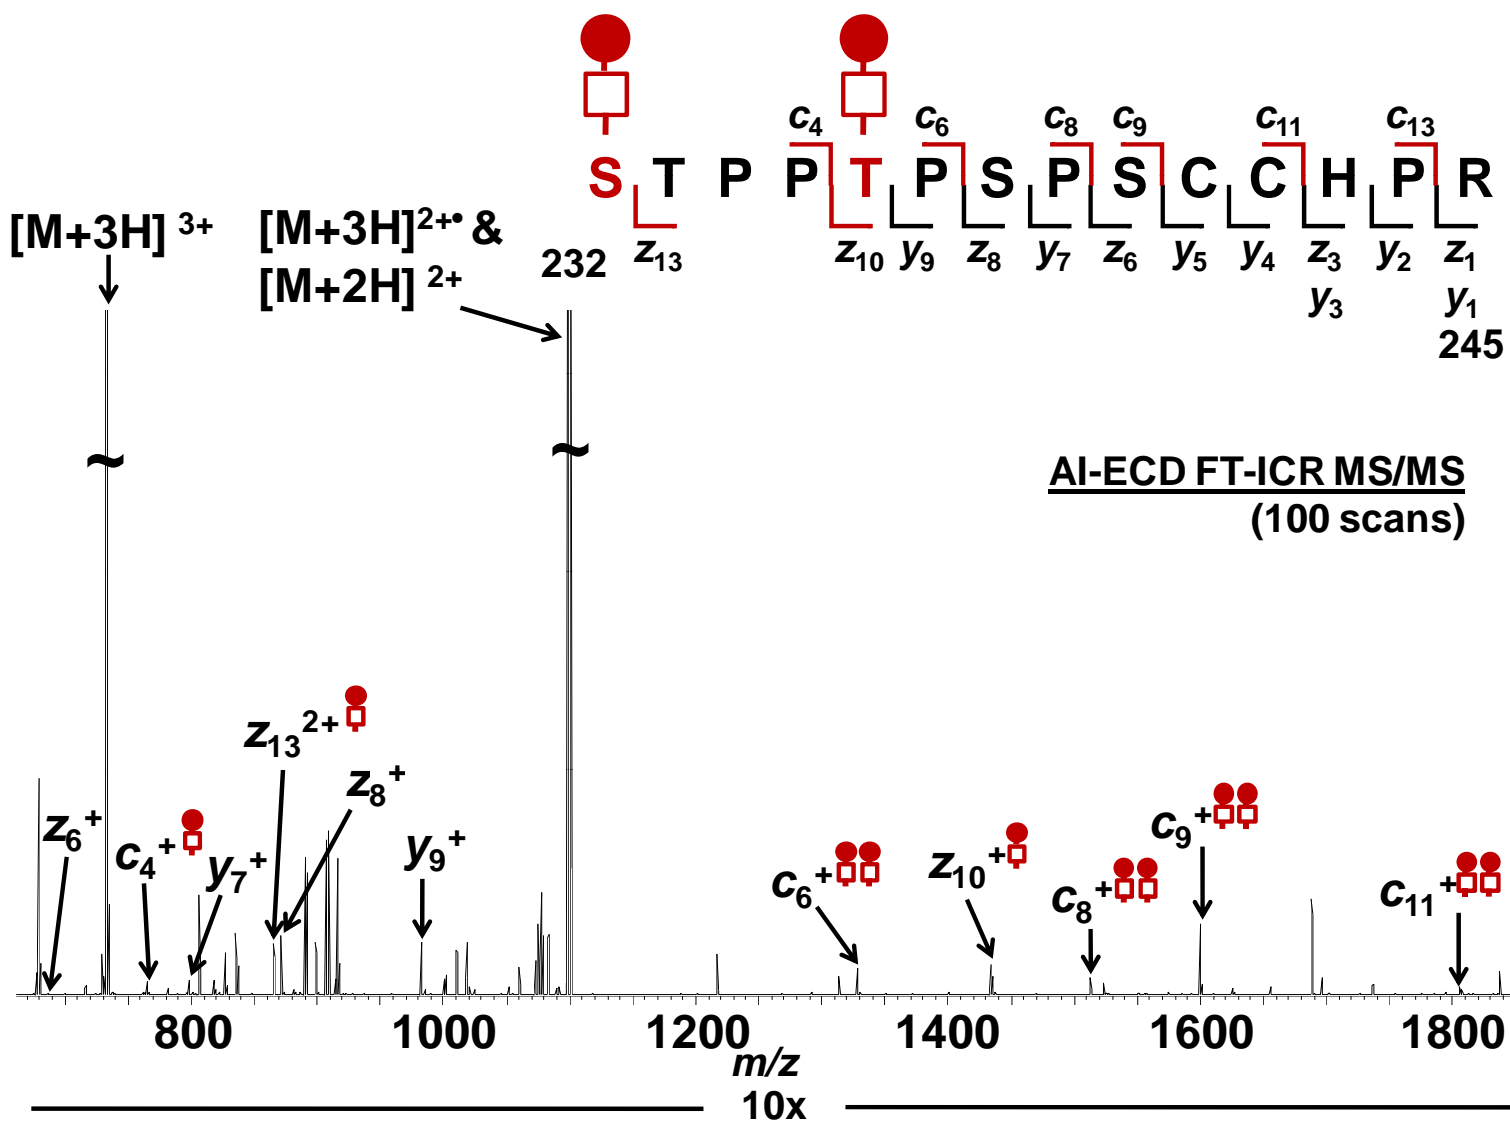

| <i>m/z</i> | charge | assignment            |
|------------|--------|-----------------------|
| 160.108    | 1      | <i>z</i> 1            |
| 175.119    | 1      | <i>y</i> 1            |
| 272.172    | 1      | <i>y</i> 2            |
| 393.213    | 1      | <i>z</i> 3            |
| 409.232    | 1      | <i>y</i> 3            |
| 512.241    | 1      | <i>y</i> 4            |
| 615.251    | 1      | <i>y</i> 5            |
| 687.273    | 1      | <i>z</i> 6            |
| 732.977    | 3      | M                     |
| 765.355    | 1      | <i>c</i> 4 + □ 1 ● 1  |
| 798.330    | 1      | <i>y</i> 7            |
| 871.361    | 1      | <i>z</i> 8            |
| 865.377    | 2      | <i>z</i> 13 + □ 1 ● 1 |
| 871.359    | 1      | <i>z</i> 8            |
| 886.384    | 1      | <i>y</i> 8            |
| 982.416    | 1      | <i>y</i> 9            |
| 1098.966   | 1      | M                     |
| 1328.593   | 1      | <i>c</i> 6 + □ 2 ● 2  |
| 1434.599   | 1      | <i>z</i> 10 + □ 1 ● 1 |
| 1512.680   | 1      | <i>c</i> 8 + □ 2 ● 2  |
| 1599.715   | 1      | <i>c</i> 9 + □ 2 ● 2  |
| 1805.742   | 1      | <i>c</i> 11 + □ 2 ● 2 |
| 2039.843   | 1      | <i>c</i> 13 + □ 2 ● 2 |

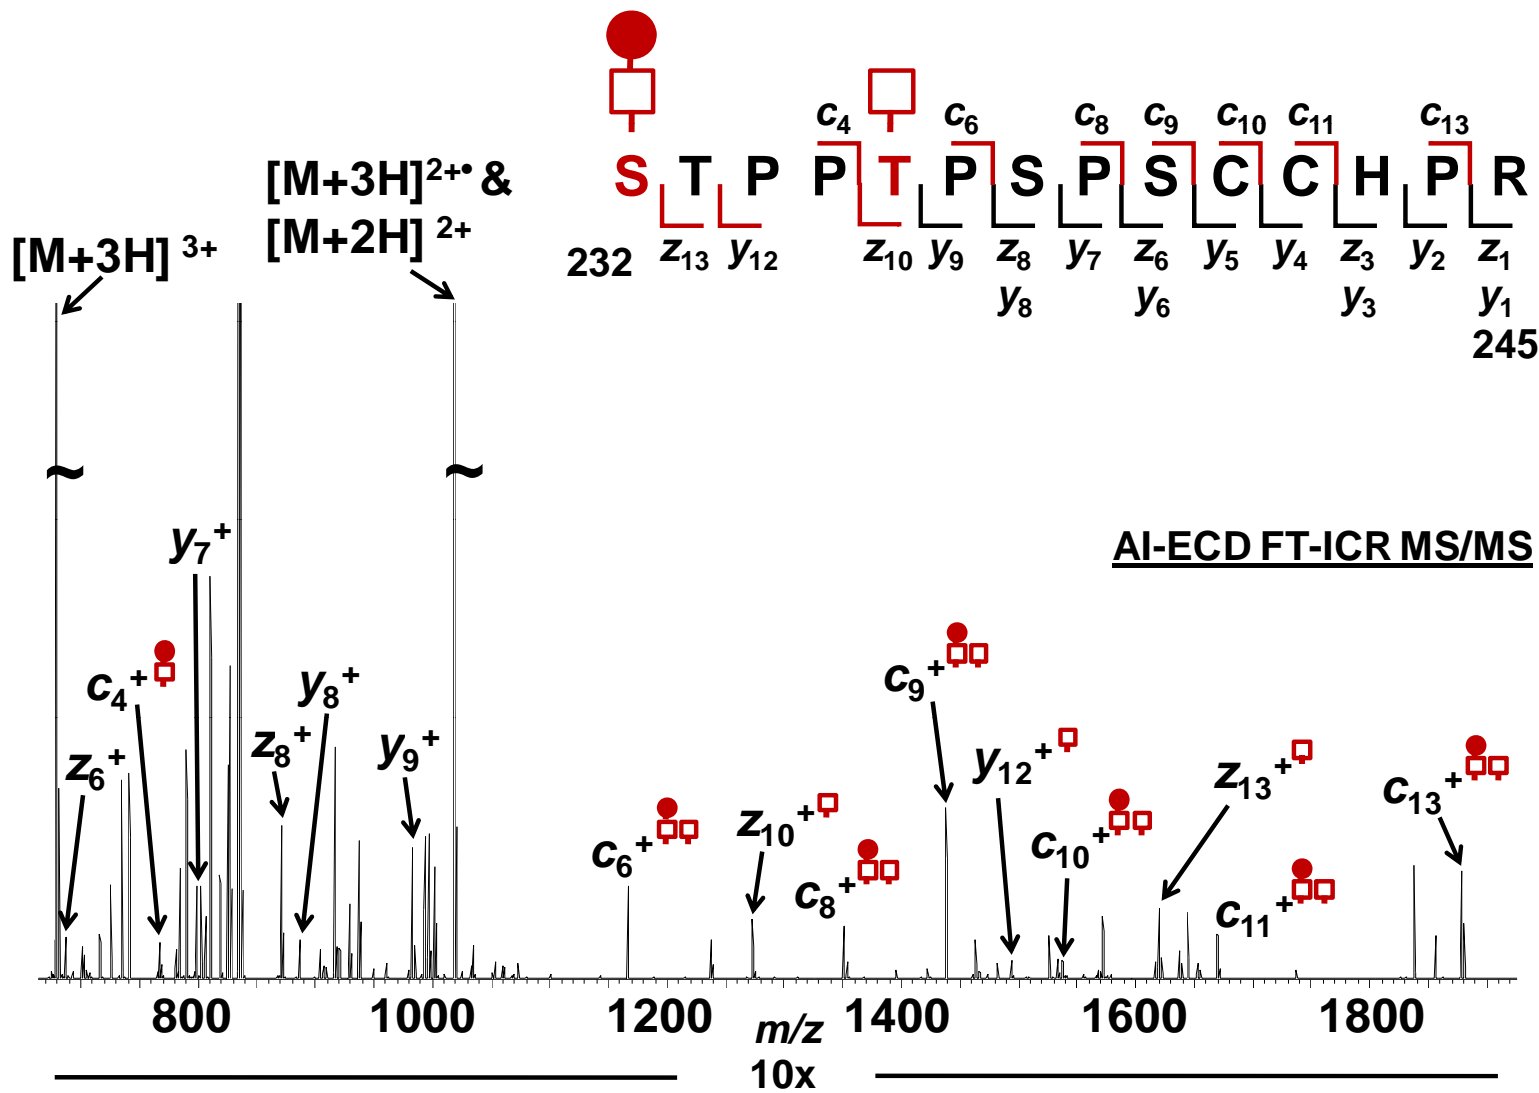

| <i>m/z</i> | charge | assignment  |
|------------|--------|-------------|
| 160.108    | 1      | z1          |
| 175.119    | 1      | y1          |
| 272.172    | 1      | y2          |
| 393.213    | 1      | z3          |
| 409.232    | 1      | y3          |
| 512.241    | 1      | y4          |
| 615.251    | 1      | y5          |
| 678.962    | 3      | M           |
| 687.273    | 1      | z6          |
| 765.350    | 1      | c4 + □1 ●1  |
| 798.33     | 1      | y7          |
| 871.360    | 1      | z8          |
| 886.371    | 1      | y8          |
| 983.424    | 1      | y9          |
| 1017.941   | 2      | M           |
| 1166.539   | 1      | c6 + □2 ●1  |
| 1272.544   | 1      | z10 + □1    |
| 1350.627   | 1      | c8 + □2 ●1  |
| 1437.660   | 1      | c9 + □2 ●1  |
| 1481.661   | 1      | y12 + □1    |
| 1540.667   | 1      | c10 + □2 ●1 |
| 1567.695   | 1      | z13 + □1    |
| 1643.682   | 1      | c11 + □2 ●1 |
| 1877.796   | 1      | c13 + □2 ●1 |

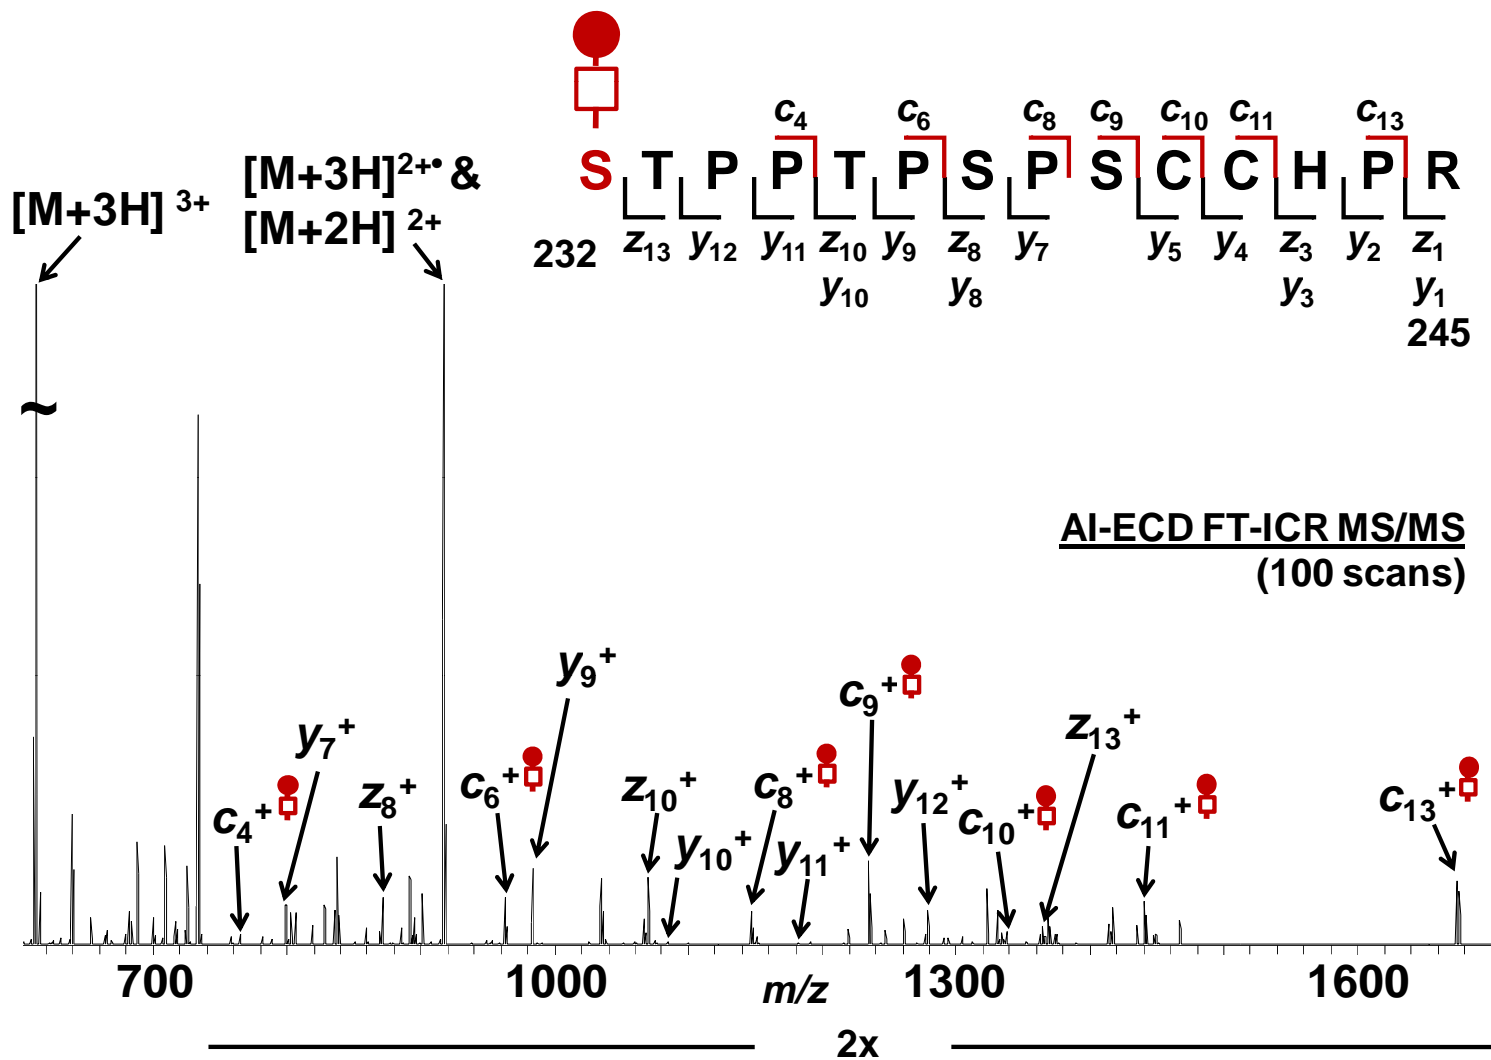

| <i>m/z</i> | charge | assignment                                                                  |
|------------|--------|-----------------------------------------------------------------------------|
| 160.108    | 1      | z1                                                                          |
| 175.119    | 1      | y1                                                                          |
| 272.172    | 1      | y2                                                                          |
| 393.213    | 1      | z3                                                                          |
| 409.232    | 1      | y3                                                                          |
| 512.242    | 1      | y4                                                                          |
| 611.268    | 3      | M                                                                           |
| 615.251    | 1      | y5                                                                          |
| 765.354    | 1      | c4 + <span style="color:red">□</span> 1 <span style="color:red">●</span> 1  |
| 798.33     | 1      | y7                                                                          |
| 871.360    | 1      | z8                                                                          |
| 886.370    | 1      | y8                                                                          |
| 916.4      | 1      | M                                                                           |
| 963.457    | 1      | c6 + <span style="color:red">□</span> 1 <span style="color:red">●</span> 1  |
| 982.416    | 1      | y9                                                                          |
| 1069.463   | 1      | z10                                                                         |
| 1084.475   | 1      | y10                                                                         |
| 1147.545   | 1      | c8 + <span style="color:red">□</span> 1 <span style="color:red">●</span> 1  |
| 1181.528   | 1      | y11                                                                         |
| 1234.578   | 1      | c9 + <span style="color:red">□</span> 1 <span style="color:red">●</span> 1  |
| 1278.581   | 1      | y12                                                                         |
| 1337.589   | 1      | c10 + <span style="color:red">□</span> 1 <span style="color:red">●</span> 1 |
| 1364.616   | 1      | z13                                                                         |
| 1440.600   | 1      | c11 + <span style="color:red">□</span> 1 <span style="color:red">●</span> 1 |
| 1674.715   | 1      | c13 + <span style="color:red">□</span> 1 <span style="color:red">●</span> 1 |
